# Supplementary material
Source: publisher figshare collection journal article supplement (https://acs.figshare.com/ndownloader/files/4706602)
Supplement: Supplementary file 1 [file 4706602]

## LIST of SUPPORTING INFORMATION

### **An Efficient NO Equivalent for Activation of Molecular Oxygen and its Applications in Transition-Metal-Free Catalytic Aerobic Alcohol Oxidation**

Yi Xie, Weimin Mo, Dong Xu, Zhenlu Shen, Nan Sun, Baoxiang Hu and Xinquan Hu \*

College of Chemical Engineering and Material Science, Zhejiang University of Technology, Hangzhou, 310014, People's Republic of China

\*To whom correspondence should be address.

E-mail: [xinquan@zjut.edu.cn](mailto:xinquan@zjut.edu.cn)

1. Complete ref. 12a .
2. Experimental Section-General (3 page).
3. Figure List (2 pages)
4. GC diagrams and NMR spectra (37 pages)

## SUPPORTING INFORMATION

### An Efficient NO Equivalent for Activation of Molecular Oxygen and its Applications in Transition-Metal-Free Catalytic Aerobic Alcohol Oxidation

Yi Xie, Weimin Mo, Dong Xu, Zhenlu Shen, Nan Sun, Baoxiang Hu and Xinquan Hu \*

College of Chemical Engineering and Material Science, Zhejiang University of Technology, Hangzhou, 310014, People's Republic of China

\*To whom correspondence should be address.

E-mail: [xinquan@zjut.edu.cn](mailto:xinquan@zjut.edu.cn)

#### Complete ref. 12a

12. (a) Barvian, M.; Boschelli, D. H.; Cossrow, J.; Dobrusin, E.; Fattaey, A.; Fritsch, A.; Fry, D.; Harvey, P.; Keller, P.; Garrett, M.; La, F.; Leopold, W.; McNamara, D.; Quin, M.; Trumpp-Kallmeyer, S.; Toogood, P.; Wu, Z.; Zhang, E. *J. Med. Chem.* **2000**, *43*, 4606.

#### Experimental Section

**General. Equipment and Material** All experiments were carried out in a closed Teflon-lined 316L stainless steel autoclave (300 mL), the initial atmospheric air in the autoclave did not exchange for all oxidations. <sup>1</sup>H NMR spectrum was recorded (400MHz) CDCl<sub>3</sub> or d<sup>6</sup>-DMSO as the solvents with TMS as an internal reference. Conversions and selectivities were determined by GC analysis. Impurities were confirmed by GC-MS. Conversion and purity of the compound with a high melting point was detected via HPLC analysis. Benzyl alcohol, 1-octanol, 2-octanol were domestic reagents. Benzyl alcohol for high TON reactions was redistilled before using. TEMPO, *tert*-butyl nitrite (TBN), 4-methyl benzyl alcohol, 3-methyl benzyl alcohol, 2-methyl benzyl alcohol, 4-chloro benzyl alcohol, 3-chloro-benzyl alcohol, 2-chloro benzyl alcohol, 2-thiophene methanol, 3-pyridine methanol, 4-nitrobenzyl alcohol,  $\alpha$ -methyl-benzyl alcohol were commercial products. 1-(4-Methylphenyl)-1-ethanol and 1-(4-chlorophenyl)-1-ethanol were reduced from their corresponding acetophenones and their purity was confirmed by GC analysis. 4-Amino-2-methylthio-pyrimidine-5-methanol was prepared according to the literature procedure (1, 2).

**Typical procedure of aerobic oxidation alcohols with benzyl alcohol as an example** (entry 1 in Table 2): To a Teflon-lined 316L stainless steel autoclave (300 mL), added 10.80 g (100 mmol) of benzyl alcohol, 15.6 mg (0.1 mmol, 0.1 mol%) of TEMPO, 48  $\mu$ L (70 mg, 0.4 mmol, 0.4 mol%) of 48% HBr ( $d = 1.46$ ), 46  $\mu$ L (41 mg, 0.4 mmol, 0.4 mol%) of TBN, 1.0 mL of water. Then closed the autoclave and charged oxygen to 0.6 MPa. Put the autoclave into the oil bath, which was preheated to 80  $^{\circ}$ C. 4 hours later, the barometer dropped to 0.2 MPa indicated that the reaction was finished. The autoclave was taken out from the heating bath, cooled to room temperature and carefully depressurized the autoclave. Diluted the sample with  $\text{CH}_2\text{Cl}_2$  and detected the conversion and selectivity by GC without any purification. GC result showed the reaction complete, the liquid in the autoclave was transferred into a separation funnel, washed with water (10 mL  $\times$  2), the organic layer was dried over anhydrous  $\text{Na}_2\text{SO}_4$ , concentrated to dryness to yield 10.25 g (96.7%) as an oil.

**Procedure of oxidation of 4-nitrobenzyl alcohol** (entry 10 in Table 2): To a Teflon-lined 316L stainless steel autoclave (300 mL), added 15.31 g (100 mmol) of 4-nitro benzyl alcohol, 78.0 mg (0.5 mmol, 0.5 mol%) of TEMPO, 350 mg (2.0 mmol, 2 mol%) of 48% HBr, 210 mg (2.0 mmol, 2 mol%) of TBN, 20 mL of acetonitrile (the minimum volume to form a slurry at room temperature). Then closed the autoclave and charged oxygen to 0.6 MPa. Put the autoclave into the oil bath, which was preheated to 80  $^{\circ}$ C. 6 hours later, the barometer, whose pressure was dropped to 0.2 MPa, indicated that the oxidation was complete. The autoclave was taken out from the heating bath, cooled to room temperature and carefully depressurized the autoclave. Sampling to GC analysis and the result showed it was a clean oxidation. Diluted the slurry with 20 mL of water and then filtered. The solid was washed with water (10 mL  $\times$  2) and dried to yield 14.65 g (97.0%) as a pale yellow solid. The structure of 4-nitro benzaldehyde was confirmed by  $^1\text{H}$  NMR (S-27).

**Procedure of oxidation of 4-amino-2-methylthio-pyrimidine-5-methanol** (entry 16 in Table 2): To a Teflon-lined 316L stainless steel autoclave (300 mL), added 16.40 g (96 mmol) of 4-amino-2-methylthio-pyrimidine-5-methanol, 0.30 g (1.92 mmol, 2 mol%) of TEMPO, 1.34 g (7.68 mmol, 8 mol%) of 48% HBr, 0.79 g (7.68 mmol, 8 mol%) of TBN, 40 mL of acetonitrile (the minimum volume to form a slurry at room temperature). Then closed the autoclave and charged oxygen to 0.6 MPa. Put the autoclave into the oil bath, which was preheated to 80  $^{\circ}$ C. 6 hours later, the barometer, whose pressure was dropped to 0.2 MPa, indicated that the oxidation was complete. The autoclave was taken out from the heating bath, cooled to room temperature and carefully depressurized the autoclave. Diluted the slurry with 40 mL of water and then filtered. The solid was washed with aqueous acetonitrile (1 : 1, v/v, 20 mL  $\times$  2) and dried to yield 13.30 g (81.8%) as a yellow solid. The structure of 4-amino-2-methylthio-pyrimidine-5-carboxaldehyde was confirmed by  $^1\text{H}$  NMR (S-42) and  $^{13}\text{C}$  NMR (S-43), the purity of product was analysis by HPLC (S-41).

**General GC conditions:** FFAP column, 30m x 0.25mm (id); FID detector, 240 °C; injection: 240 °C; carrier gas: nitrogen; carrier gas rate: 1.0 mL / min; area normalization.

Benzyl alcohol, 4-methyl benzyl alcohol, 3-methyl benzyl alcohol, 2-methyl benzyl alcohol, 4-chloro benzyl alcohol, 3-chloro benzyl alcohol, 2-chloro benzyl alcohol, 2-thiophene methanol, 3-pyridine methanol, 4-nitro benzyl alcohol,  $\alpha$ -methyl benzyl alcohol, 1-(4-methylphenyl)-1-ethanol, 1-(4-chlorophenyl)-1-ethanol and their corresponding carbonyl compounds were detected under a condition as: column temperature: 100 °C for 2 minutes, raising to 240 °C in a rate of 10 °C / min.

1-Octanol, 2-octanol and their corresponding carbonyl compounds were performed under a condition as: 80 °C for 5 minutes, raising to 240 °C in a rate of 10 °C / min.

**HPLC condition for 4-amino-2-methylthio-pyrimidine-5-methanol:** C18 column, 25cm x 4.6mm (id); UV detector at 254 nm; eluent phase: acetonitrile : water = 70 : 30; Flow rate = 0.8 mL / min.

**Reference:**

1. Ulbricht T. L. V.; Price, C. C. *J. Org. Chem.* **1956**, 21, 567.
2. Dymicky, M.; Caldwell, W. T. *J. Org. Chem.* **1962**, 27, 4211.

## Figure List

- Figure 1: GC diagram of benzyl alcohol.
- Figure 2: GC diagram of benzaldehyde from oxidation of benzyl alcohol.
- Figure 3: GC diagram of 4-methyl benzyl alcohol.
- Figure 4: GC diagram of 4-methyl benzaldehyde from oxidation of 4-methyl benzyl alcohol.
- Figure 5: GC diagram of 3-methyl benzyl alcohol.
- Figure 6: GC diagram of 3-methyl benzaldehyde from oxidation of 3-methyl benzyl alcohol.
- Figure 7: GC diagram of 2-methyl benzyl alcohol.
- Figure 8: GC diagram of 2-methyl benzaldehyde from oxidation of 2-methyl benzyl alcohol.
- Figure 9: GC diagram of 4-chloro benzyl alcohol.
- Figure 10: GC diagram of 4-chloro benzaldehyde from oxidation of 4-chloro benzyl alcohol.
- Figure 11: GC diagram of 3-chloro benzyl alcohol.
- Figure 12: GC diagram of 3-chloro benzaldehyde from oxidation of 3-chloro benzyl alcohol.
- Figure 13: GC diagram of 2-chloro benzyl alcohol.
- Figure 14: GC diagram of 2-chloro benzaldehyde from oxidation of 2-chloro benzyl alcohol.
- Figure 15: GC diagram of 2-thiophene methanol.
- Figure 16: GC diagram of 2-thiophene carboxaldehyde from oxidation of 2-thiophene methanol.
- Figure 17: GC diagram of 3-pyridine methanol.
- Figure 18: GC diagram of 3-pyridine carboxaldehyde from oxidation of 3-pyridine methanol.
- Figure 19: GC diagram of 4-nitro benzyl alcohol.
- Figure 20: GC diagram of 4-nitro benzaldehyde from oxidation of 4-nitro benzyl alcohol.
- Figure 21:  $^1\text{H}$  NMR spectrum of 4-nitrobenzaldehyde (isolated).
- Figure 22: GC diagram of  $\alpha$ -methyl benzyl alcohol.
- Figure 23: GC diagram of acetophenone from oxidation of  $\alpha$ -methyl benzyl alcohol.
- Figure 24: GC diagram of 1-(4-methylphenyl)-1-ethanol.
- Figure 25: GC diagram of 4-methyl acetophenone from oxidation of 1-(4-methylphenyl)-1-ethanol.
- Figure 26: GC diagram of 1-(4-chlorophenyl)-1-ethanol.
- Figure 27: GC diagram of 4-chloro acetophenone from oxidation of 1-(4-chlorophenyl)-1-ethanol.
- Figure 28:  $^1\text{H}$  NMR spectrum of 4-chloro acetophenone (isolated).
- Figure 29: GC diagram of 2-octanol.
- Figure 30: GC diagram of 2-octanone from oxidation of 2-octanol.
- Figure 31: GC diagram of 1-octanol.
- Figure 32: GC diagram of oxidation of 1-octanol.
- Figure 33: GC diagram of 1-octanal (isolated via distillation).
- Figure 34: HPLC diagram of 4-amino-2-methylthio-pyrimidine-5-methanol.
- Figure 35: HPLC diagram of 4-amino-2-methylthio-pyrimidine-5-carboxaldehyde (isolated).
- Figure 36:  $^1\text{H}$  NMR spectrum of 4-amino-2-methylthio-pyrimidine-5-carboxaldehyde (isolated).

Figure 37:  $^{13}\text{C}$  NMR spectrum of 4-amino-2-methylthio-pyrimidine-5-carboxaldehyde (isolated).

## Supporting Information

C:\HS2000G\Oxidation\20061213-6.che

2007-01-31

### GC REPORT

Sample Name:C6H5CH2OH

File Name:C:\HS2000G\Oxidation\20061213-6.che

Method:area normalization

Injection Date:2006.12.13 11.28

Column:FFAP, 100 C(2 min)--10 C/min--240 C. Flow: 1.0mL/min

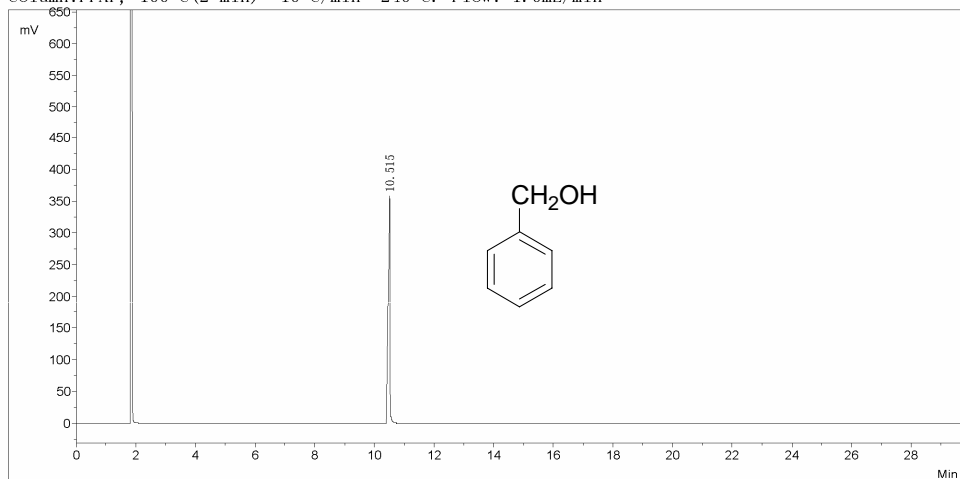

| No.   | PeakNo | ID. Name | R. Time | PeakHeight | PeakArea  | Conc (%) |
|-------|--------|----------|---------|------------|-----------|----------|
| 1     | 1      |          | 10.515  | 356014.4   | 1529523.4 | 100.0000 |
| Total |        |          |         | 356014.4   | 1529523.4 | 100.0000 |

**Figure 1.**  
**GC diagram of benzyl alcohol.**

## Supporting Information

C:\HS2000G\Oxidation\20061230-6.che

2007-01-29

### GC REPORT

Sample Name: File Name: C:\HS2000G\Oxidation\20061230-6.che  
Method: area normalization Injection Date: 2006.12.30 22:19  
Column: FFAP, 100 C(2 min)--10 C/min--240 C. Flow: 1.0mL/min

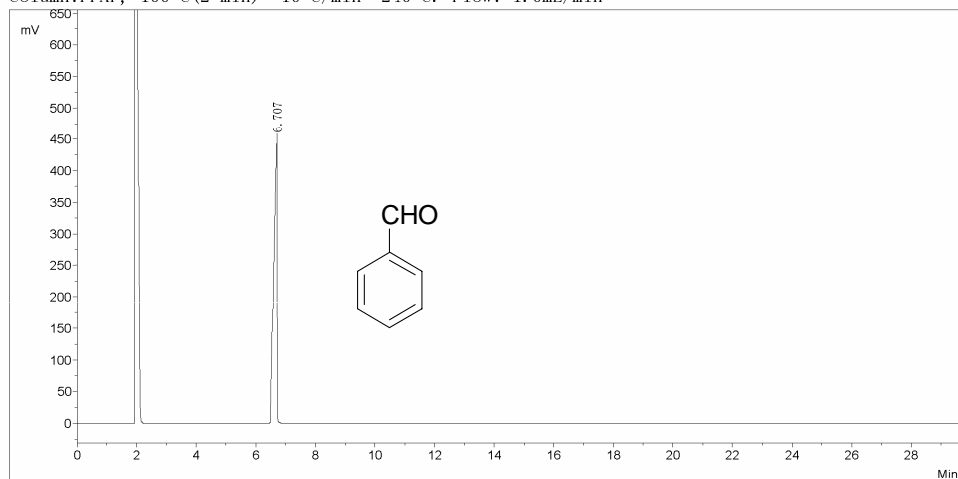

| No.   | PeakNo | ID. Name | R. Time | PeakHeight | PeakArea  | Conc (%) |
|-------|--------|----------|---------|------------|-----------|----------|
| 1     | 1      |          | 6.707   | 452312.3   | 3488300.7 | 100.0000 |
| Total |        |          |         | 452312.3   | 3488300.7 | 100.0000 |

**Figure 2.**  
**GC diagram of benzaldehyde from oxidation of benzyl alcohol**

## Supporting Information

C:\HS2000G\Oxidation\20070118-3.che

2007-01-29

### GC REPORT

Sample Name: 4-CH<sub>3</sub>C<sub>6</sub>H<sub>4</sub>CH<sub>2</sub>OH

File Name: C:\HS2000G\Oxidation\20070118-3.che

Method: area normalization

Injection Date: 2007.01.18 12:27

Column: FFAP, 100 C(2 min)--10 C/min--240 C. Flow: 1.0mL/min

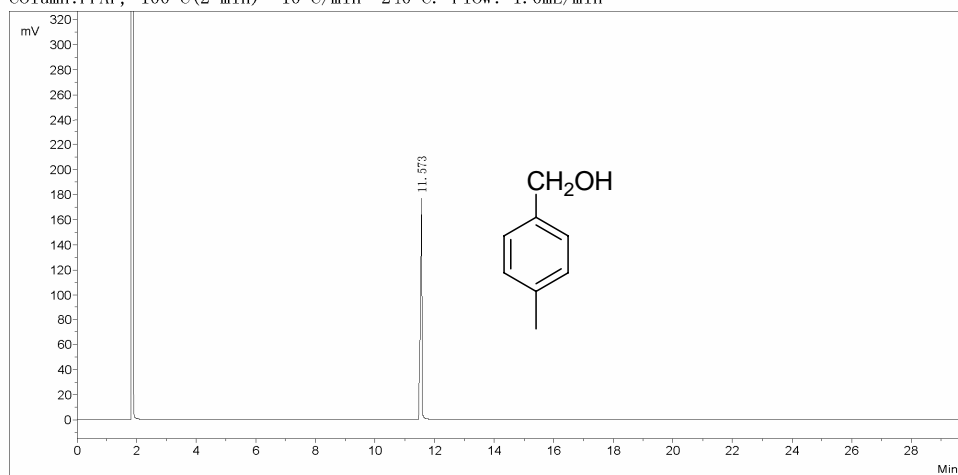

| No.   | PeakNo | ID. Name | R. Time | PeakHeight | PeakArea | Conc (%) |
|-------|--------|----------|---------|------------|----------|----------|
| 1     | 1      |          | 11.573  | 176605.1   | 692903.4 | 100.0000 |
| Total |        |          |         | 176605.1   | 692903.4 | 100.0000 |

**Figure 3.**  
**GC diagram of 4-methyl benzyl alcohol.**

## Supporting Information

C:\HS2000G\Oxidation\20070110-5.che

2007-01-29

### GC REPORT

Sample Name: File Name: C:\HS2000G\Oxidation\20070110-5.che  
Method: area normalization Injection Date: 2007.01.10 18:29  
Column: FFAP, 100 C(2 min)—10 C/min—240 C. Flow: 1.0mL/min

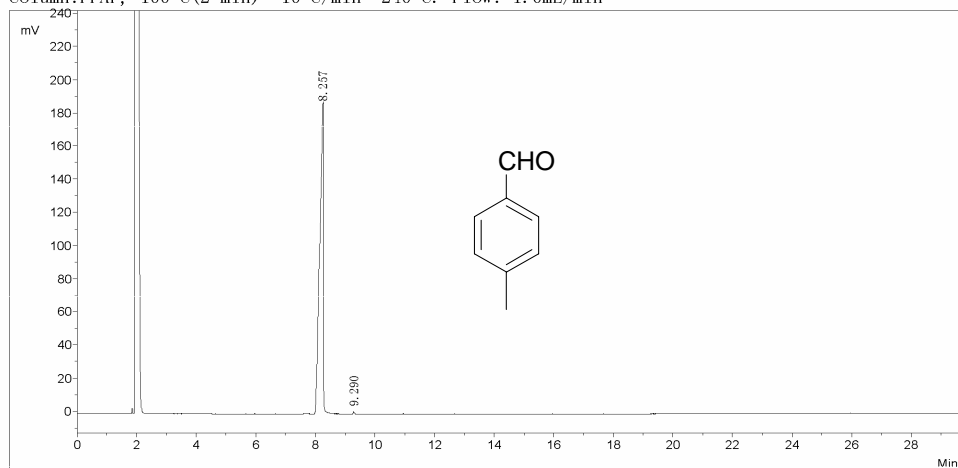

| No.   | PeakNo | ID. Name | R. Time | PeakHeight | PeakArea  | Conc (%) |
|-------|--------|----------|---------|------------|-----------|----------|
| 1     | 1      |          | 8.257   | 185659.4   | 1539971.4 | 99.7585  |
| 2     | 2      |          | 9.290   | 1410.5     | 3728.3    | 0.2415   |
| Total |        |          |         | 187069.9   | 1543699.6 | 100.0000 |

**Figure 4.**  
GC diagram of 4-methyl benzaldehyde from oxidation of 4-methyl benzyl alcohol.

## Supporting Information

C:\HS2000G\Oxidation\20070110-2.che

2007-01-29

### GC REPORT

Sample Name:3-CH<sub>3</sub>C<sub>6</sub>H<sub>4</sub>CH<sub>2</sub>OH

File Name:C:\HS2000G\Oxidation\20070110-2.che

Method:area normalization

Injection Date:2007.01.10 12:25

Column:FFAP, 100 C(2 min)--10 C/min--240 C. Flow: 1.0mL/min

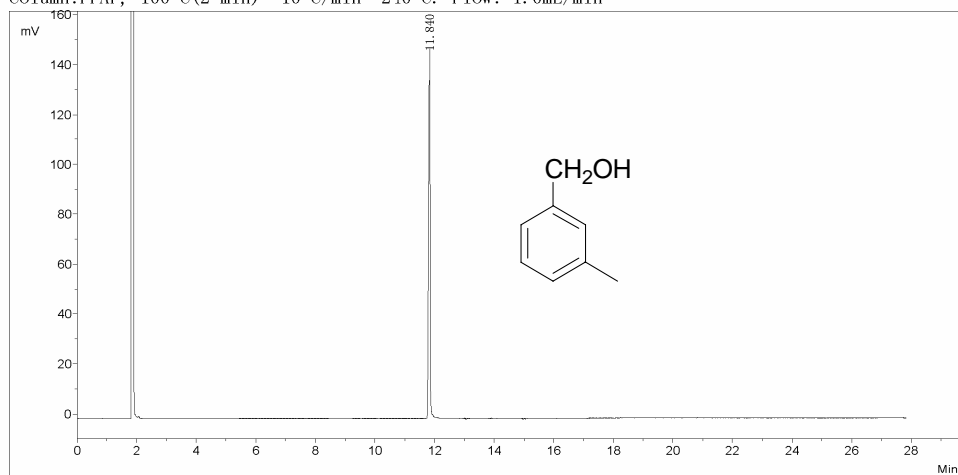

| No.   | PeakNo | ID. Name | R. Time | PeakHeight | PeakArea | Conc (%) |
|-------|--------|----------|---------|------------|----------|----------|
| 1     | 1      |          | 11.840  | 146026.5   | 472435.8 | 100.0000 |
| Total |        |          |         | 146026.5   | 472435.8 | 100.0000 |

**Figure 5.**  
**GC diagram of 3-methyl benzyl alcohol.**

## Supporting Information

C:\HS2000G\Oxidation\20070110-4.che

2007-01-29

### GC REPORT

Sample Name: File Name: C:\HS2000G\Oxidation\20070110-4.che  
Method: area normalization Injection Date: 2007.01.10 17:49  
Column: FFAP, 100 C(2 min)--10 C/min--240 C. Flow: 1.0mL/min

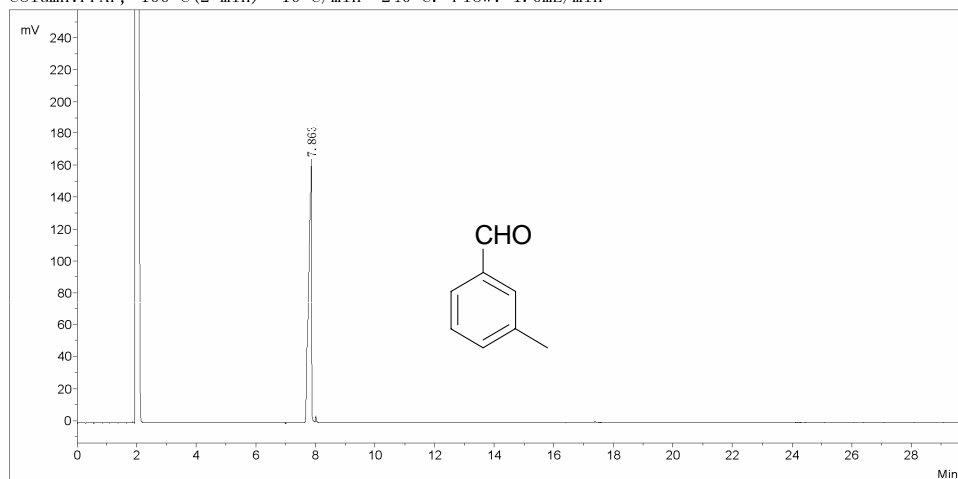

| No.   | PeakNo | ID. Name | R. Time | PeakHeight | PeakArea  | Conc (%) |
|-------|--------|----------|---------|------------|-----------|----------|
| 1     | 1      |          | 7.863   | 162285.5   | 1060252.7 | 100.0000 |
| Total |        |          |         | 162285.5   | 1060252.7 | 100.0000 |

**Figure 6.**  
**GC diagram of 3-methyl benzaldehyde from oxidation of 3-methyl benzyl alcohol.**

## Supporting Information

C:\HS20006\Oxidation\20070117-5.che

2007-01-29

### GC REPORT

Sample Name: 2-CH<sub>3</sub>C<sub>6</sub>H<sub>4</sub>CH<sub>2</sub>OH

File Name: C:\HS20006\Oxidation\20070117-5.che

Method: area normalization

Injection Date: 2007.01.17 20:20

Column: FFAP, 100 C(2 min)--10 C/min--240 C. Flow: 1.0mL/min

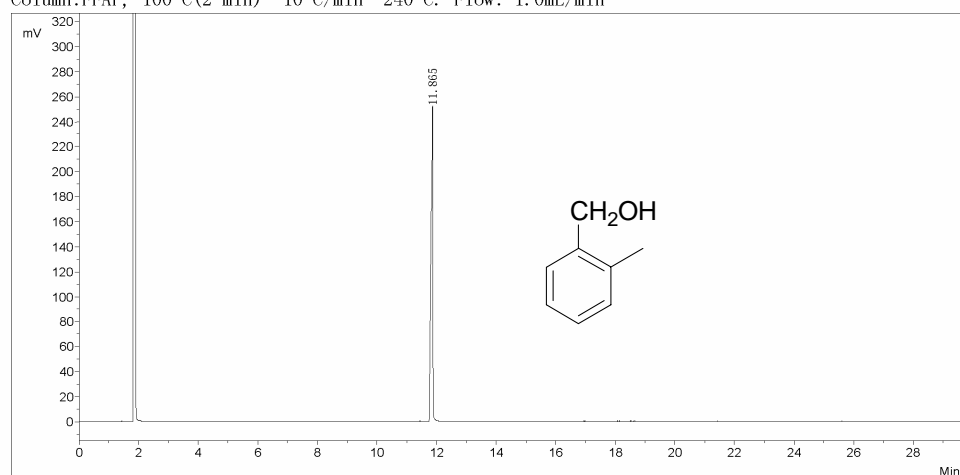

| No.   | PeakNo | ID. Name | R. Time | PeakHeight | PeakArea  | Conc (%) |
|-------|--------|----------|---------|------------|-----------|----------|
| 1     | 1      |          | 11.865  | 248479.6   | 1065711.1 | 100.0000 |
| Total |        |          |         | 248479.6   | 1065711.1 | 100.0000 |

**Figure 7.**  
**GC diagram of 2-methyl benzyl alcohol.**

## Supporting Information

C:\HS2000G\Oxidation\20070115-2.che

2007-01-29

### GC REPORT

Sample Name: File Name: C:\HS2000G\Oxidation\20070115-2.che  
Method: area normalization Injection Date: 2007.01.15 14:56  
Column: FFAP, 100 C(2 min)--10 C/min--240 C. Flow: 1.0mL/min

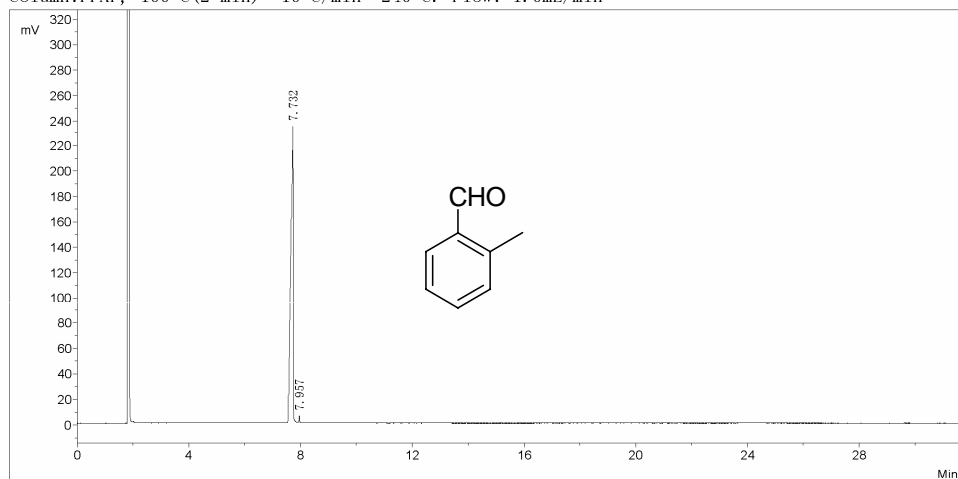

| No.   | PeakNo | ID. Name | R. Time | PeakHeight | PeakArea  | Conc (%) |
|-------|--------|----------|---------|------------|-----------|----------|
| 1     | 1      |          | 7.732   | 234640.8   | 1411849.2 | 99.1711  |
| 2     | 2      |          | 7.957   | 5511.3     | 11801.2   | 0.8289   |
| Total |        |          |         | 240152.1   | 1423650.4 | 100.0000 |

**Figure 8.**  
**GC diagram of 2-methyl benzaldehyde from oxidation of 2-methyl benzyl alcohol.**

## Supporting Information

C:\HS2000G\Oxidation\20061213-8.che

2007-01-29

### GC REPORT

Sample Name:4-ClC6H4CH2OH

File Name:C:\HS2000G\Oxidation\20061213-8.che

Method:area normalization

Injection Date:2006.12.13 14:52

Column:FFAP, 100 C(2 min)--10 C/min--240 C. Flow: 1.0mL/min

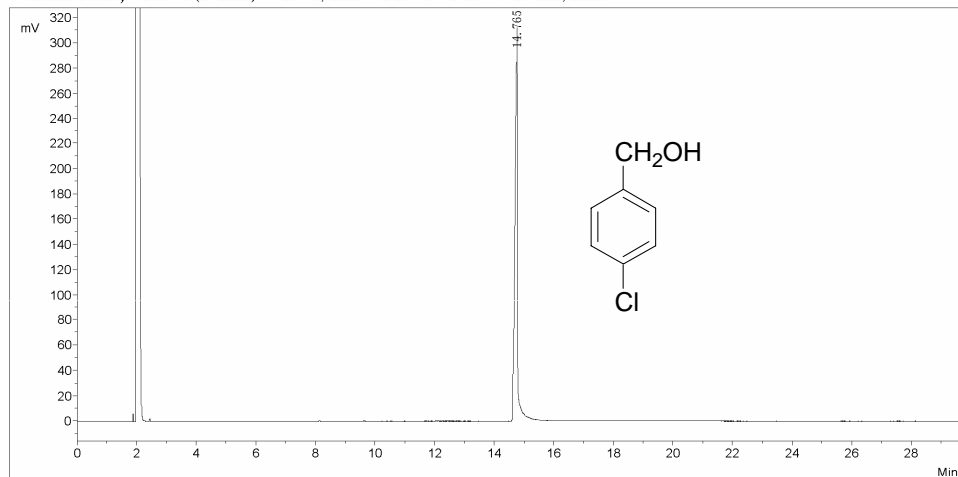

| No.   | PeakNo | ID. Name | R. Time | PeakHeight | PeakArea  | Conc (%) |
|-------|--------|----------|---------|------------|-----------|----------|
| 1     | 1      |          | 14.765  | 312358.8   | 1839284.6 | 100.0000 |
| Total |        |          |         | 312358.8   | 1839284.6 | 100.0000 |

**Figure 9.**  
**GC diagram of 4-chloro benzyl alcohol.**

## Supporting Information

C:\HS2000G\Oxidation\20070111-1.che

2007-01-29

### GC REPORT

Sample Name: File Name: C:\HS2000G\Oxidation\20070111-1.che  
Method: area normalization Injection Date: 2007.01.11 12:43  
Column: FFAP, 100 C(2 min)--10 C/min--240 C. Flow: 1.0mL/min

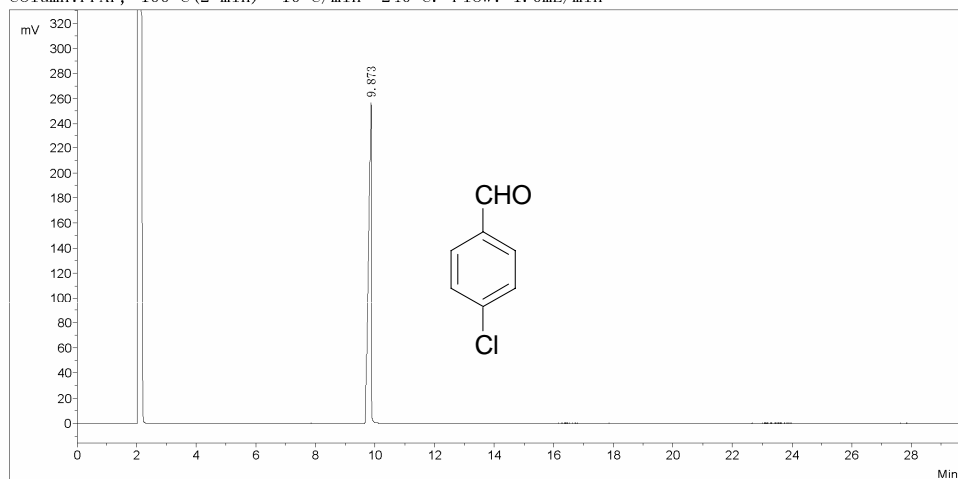

| No.   | PeakNo | ID. Name | R. Time | PeakHeight | PeakArea  | Conc (%) |
|-------|--------|----------|---------|------------|-----------|----------|
| 1     | 1      |          | 9.873   | 256775.2   | 1661398.3 | 100.0000 |
| Total |        |          |         | 256775.2   | 1661398.3 | 100.0000 |

**Figure 10.**  
**GC diagram of 4-chloro benzaldehyde from oxidation of 4-chloro benzyl alcohol.**

## Supporting Information

C:\HS2000G\Oxidation\20070109-3.che

2007-01-29

### GC REPORT

Sample Name:3-Clc6h4ch2oh

File Name:C:\HS2000G\Oxidation\20070109-3.che

Method:area normalization

Injection Date:2007.01.09 13:48

Column:FFAP, 100 C(2 min)--10 C/min--240 C. Flow: 1.0mL/min

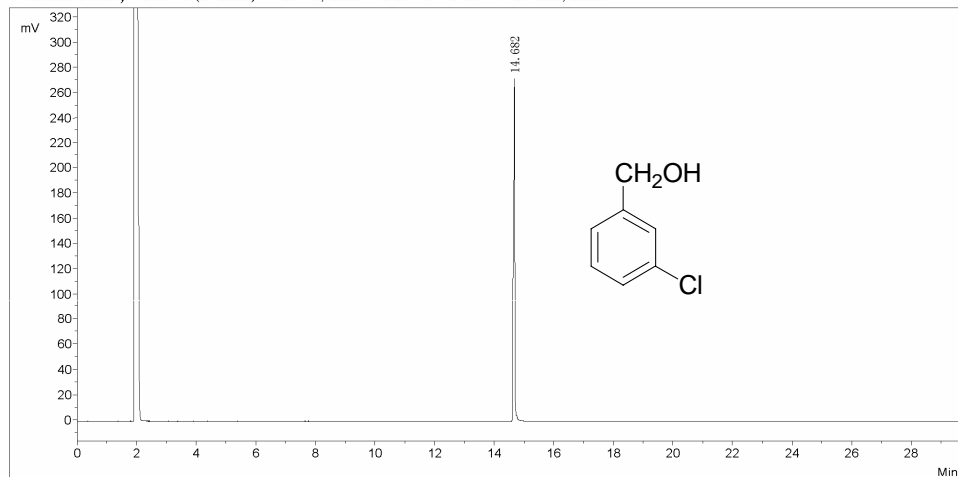

| No.   | PeakNo | ID. Name | R. Time | PeakHeight | PeakArea | Conc (%) |
|-------|--------|----------|---------|------------|----------|----------|
| 1     | 1      |          | 14.682  | 272119.8   | 889526.9 | 100.0000 |
| Total |        |          |         | 272119.8   | 889526.9 | 100.0000 |

**Figure 11.**  
**GC diagram of 3-chloro benzyl alcohol.**

## Supporting Information

C:\HS2000G\Oxidation\20070109-5.che

2007-01-29

### GC REPORT

Sample Name: File Name: C:\HS2000G\Oxidation\20070109-5.che  
 Method: area normalization Injection Date: 2007.01.09 17:42  
 Column: FFAP, 100 C(2 min)--10 C/min--240 C. Flow: 1.0mL/min

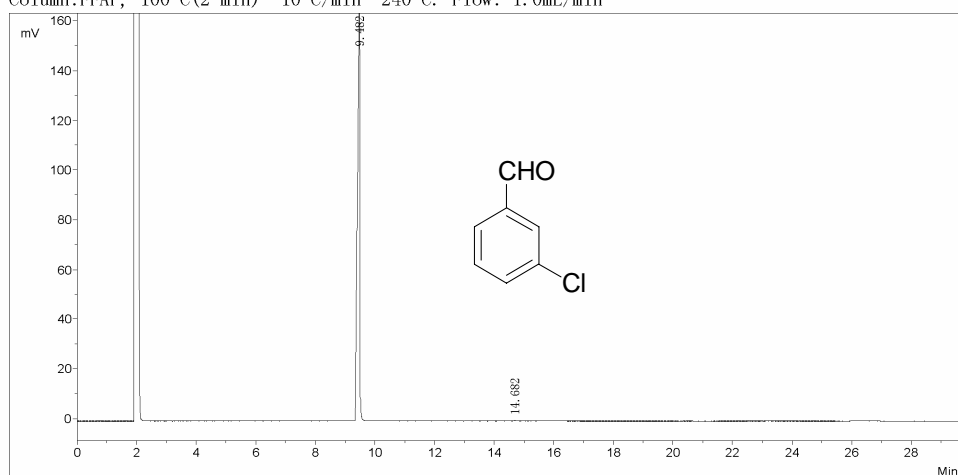

| No.   | PeakNo | ID. Name | R. Time | PeakHeight | PeakArea | Conc (%) |
|-------|--------|----------|---------|------------|----------|----------|
| 1     | 1      |          | 9.482   | 182865.4   | 981607.1 | 99.8648  |
| 2     | 2      |          | 14.682  | 394.0      | 1328.9   | 0.1352   |
| Total |        |          |         | 183259.4   | 982936.0 | 100.0000 |

**Figure 12.**  
**GC diagram of 3-chloro benzaldehyde from oxidation of 3-chloro benzyl alcohol.**

## Supporting Information

C:\HS2000G\Oxidation\20070111-3. che

2007-01-29

### GC REPORT

Sample Name: 2-ClC<sub>6</sub>H<sub>4</sub>CH<sub>2</sub>OH

File Name: C:\HS2000G\Oxidation\20070111-3. che

Method: area normalization

Injection Date: 2007.01.11 14:18

Column: FFAP, 100 C (2 min) -- 10 C/min -- 240 C. Flow: 1.0 mL/min

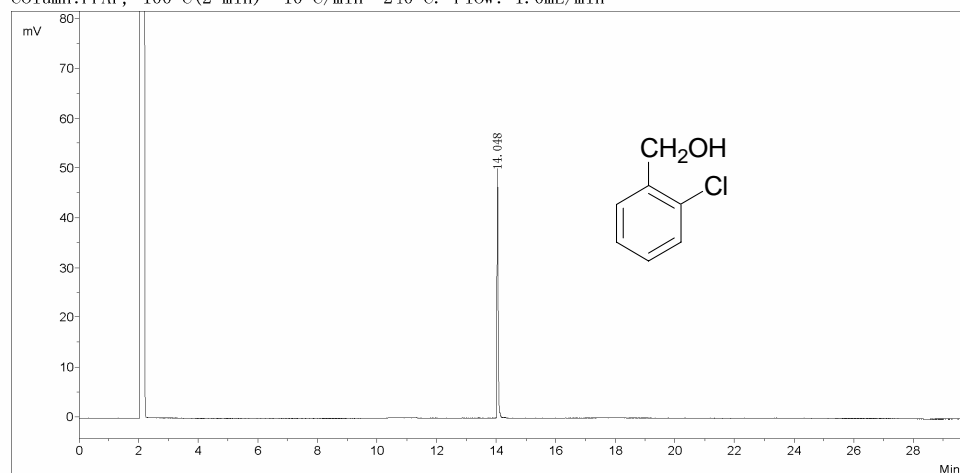

| No.   | PeakNo | ID. Name | R. Time | PeakHeight | PeakArea | Conc (%) |
|-------|--------|----------|---------|------------|----------|----------|
| 1     | 1      |          | 14.048  | 48716.5    | 126257.7 | 100.0000 |
| Total |        |          |         | 48716.5    | 126257.7 | 100.0000 |

**Figure 13.**  
**GC diagram 2-chloro benzyl alcohol.**

## Supporting Information

C:\HS2000G\Oxidation\20070111-2. che

2007-01-29

### GC REPORT

Sample Name:

File Name: C:\HS2000G\Oxidation\20070111-2. che

Method: area normalization

Injection Date: 2007.01.11 13:30

Column: FFAP, 100 C (2 min)--10 C/min--240 C. Flow: 1.0mL/min

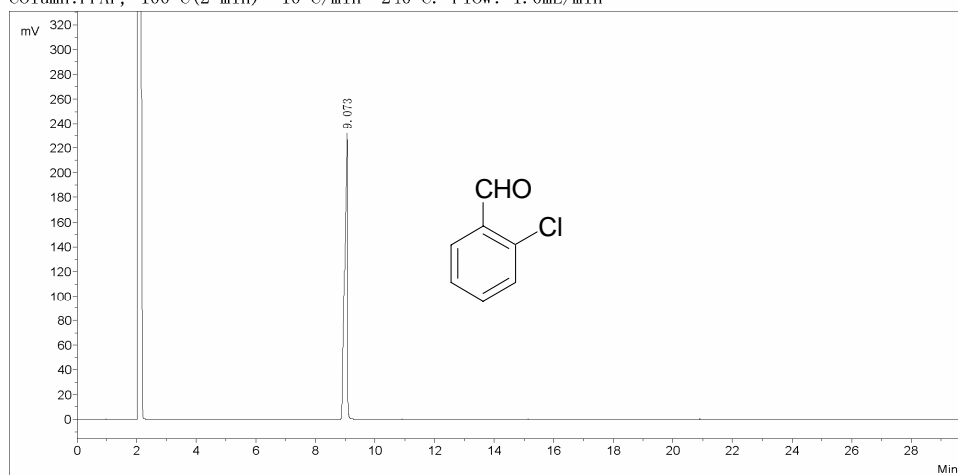

| No.   | PeakNo | ID. Name | R. Time | PeakHeight | PeakArea  | Conc (%) |
|-------|--------|----------|---------|------------|-----------|----------|
| 1     | 1      |          | 9.073   | 231374.7   | 1524662.0 | 100.0000 |
| Total |        |          |         | 231374.7   | 1524662.0 | 100.0000 |

**Figure 14.**  
**GC diagram of 2-chloro benzaldehyde from oxidation of 2-chloro benzyl alcohol.**

## Supporting Information

C:\HS2000G\Oxidation\20070117-6. che

2007-01-29

### GC REPORT

Sample Name: C<sub>4</sub>H<sub>3</sub>S-2-CH<sub>2</sub>OH

File Name: C:\HS2000G\Oxidation\20070117-6. che

Method: area normalization

Injection Date: 2007.01.17 21:04

Column: FFAP, 100 C(2 min)--10 C/min--240 C. Flow: 1.0mL/min

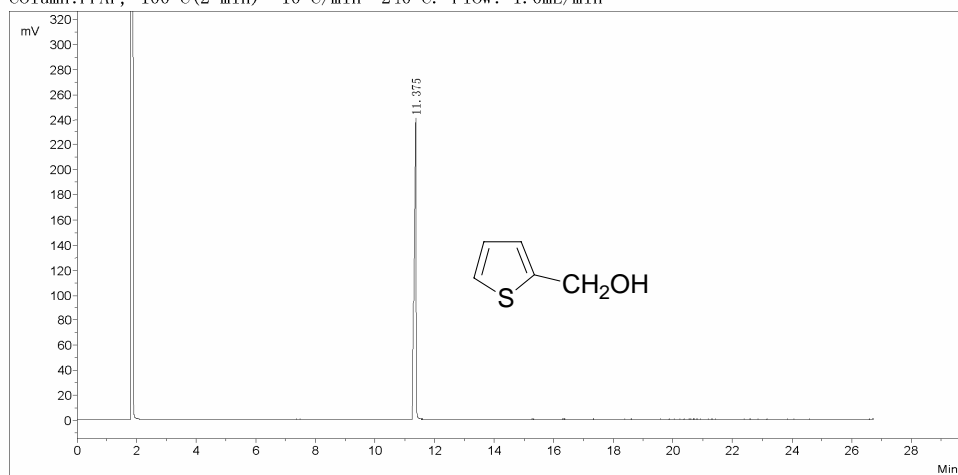

| No.   | PeakNo | ID. Name | R. Time | PeakHeight | PeakArea  | Conc (%) |
|-------|--------|----------|---------|------------|-----------|----------|
| 1     | 1      |          | 11.375  | 239177.8   | 1149982.3 | 100.0000 |
| Total |        |          |         | 239177.8   | 1149982.3 | 100.0000 |

**Figure 15.**  
**GC diagram of 2-thiophene methanol.**

## Supporting Information

C:\HS2000G\Oxidation\20070113-5.che

2007-01-29

### GC REPORT

Sample Name: File Name: C:\HS2000G\Oxidation\20070113-5.che  
 Method: area normalization Injection Date: 2007.01.13 19:13  
 Column: FFAP, 100 C(2 min)--10 C/min--240 C. Flow: 1.0mL/min

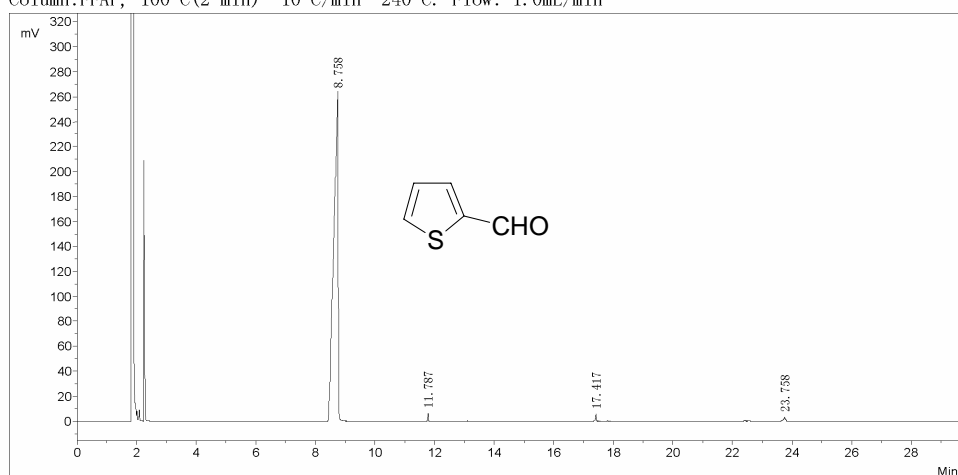

| No.   | PeakNo | ID. Name | R. Time | PeakHeight | PeakArea  | Conc (%) |
|-------|--------|----------|---------|------------|-----------|----------|
| 1     | 1      |          | 8.758   | 262757.5   | 2694568.7 | 98.8182  |
| 2     | 2      |          | 11.787  | 6228.5     | 12278.1   | 0.4503   |
| 3     | 3      |          | 17.417  | 4704.1     | 9068.0    | 0.3326   |
| 4     | 4      |          | 23.758  | 2659.5     | 10878.7   | 0.3990   |
| Total |        |          |         | 276349.5   | 2726793.6 | 100.0000 |

**Figure 16.**  
**GC diagram of 2-thiophene carboxaldehyde from oxidation of 2-thiophene methanol.**

C:\HS2000G\Oxidation\20070118-2. che

2007-01-29

## GC REPORT

Sample Name: C<sub>5</sub>H<sub>4</sub>N-3-CH<sub>2</sub>OH

File Name: C:\HS2000G\Oxidation\20070118-2. che

Method: area normalization

Injection Date: 2007.01.18 10:29

Column: FFAP, 100 C(2 min)--10 C/min--240 C. Flow: 1.0mL/min

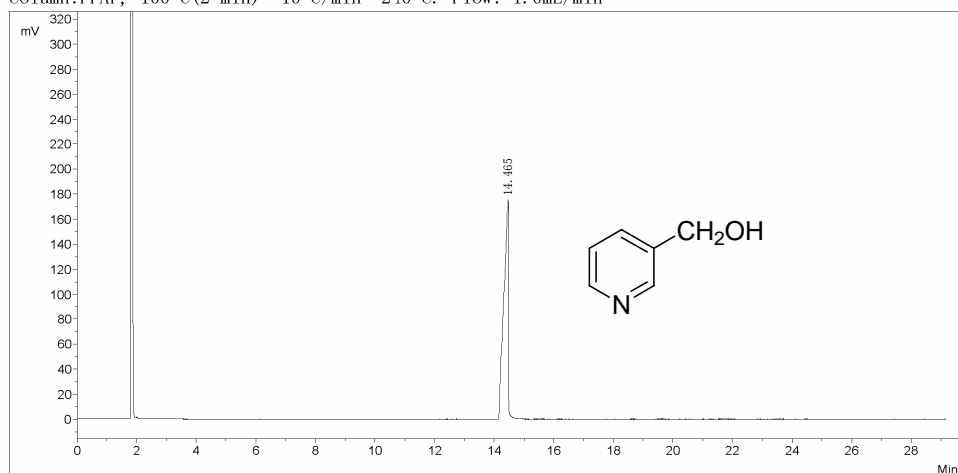

| No.   | PeakNo | ID. Name | R. Time | PeakHeight | PeakArea  | Conc (%) |
|-------|--------|----------|---------|------------|-----------|----------|
| 1     | 1      |          | 14.465  | 174492.5   | 1802519.2 | 100.0000 |
| Total |        |          |         | 174492.5   | 1802519.2 | 100.0000 |

**Figure 17.**  
**GC diagram of 3-pyridine methanol.**

C:\HS2000G\Oxidation\20070113-1.che

2007-01-29

## GC REPORT

Sample Name:

File Name:C:\HS2000G\Oxidation\20070113-1.che

Method:area normalization

Injection Date:2007.01.13 10:14

Column:FFAP, 100 C(2 min)--10 C/min--240 C. Flow: 1.0mL/min

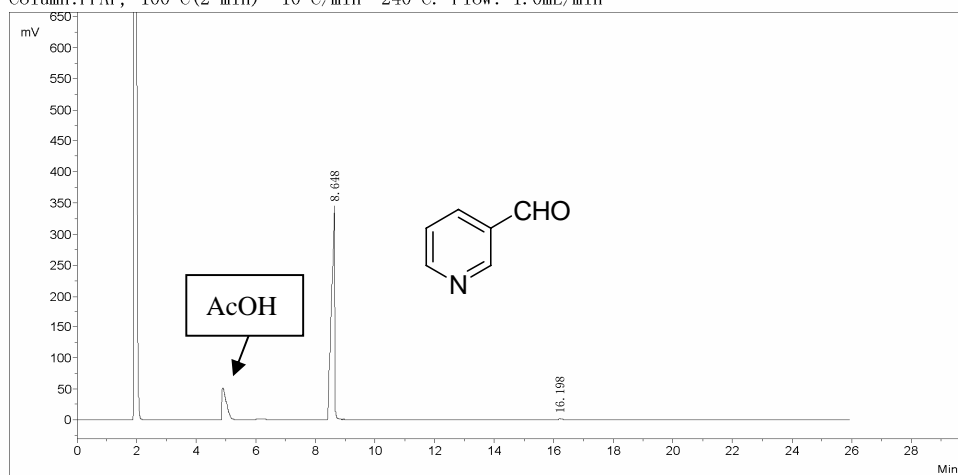

| No.   | PeakNo | ID. Name | R. Time | PeakHeight | PeakArea  | Conc (%) |
|-------|--------|----------|---------|------------|-----------|----------|
| 1     | 1      |          | 8.648   | 343971.3   | 2678102.0 | 99.6182  |
| 2     | 2      |          | 16.198  | 1617.9     | 10264.0   | 0.3818   |
| Total |        |          |         | 345589.2   | 2688366.1 | 100.0000 |

**Figure 18.**  
**GC diagram of 3-pyridine carboxaldehyde from oxidation of 3-pyridine methanol**

## Supporting Information

C:\HS20006\Oxidation\20061214-3.che

2007-01-29

### GC REPORT

Sample Name:4-NO<sub>2</sub>C<sub>6</sub>H<sub>4</sub>CH<sub>2</sub>OH

File Name:C:\HS20006\Oxidation\20061214-3.che

Method:area normalization

Injection Date:2006.12.14 13:33

Column:FFAP, 100 C(2 min)--10 C/min--240 C. Flow: 1.0mL/min

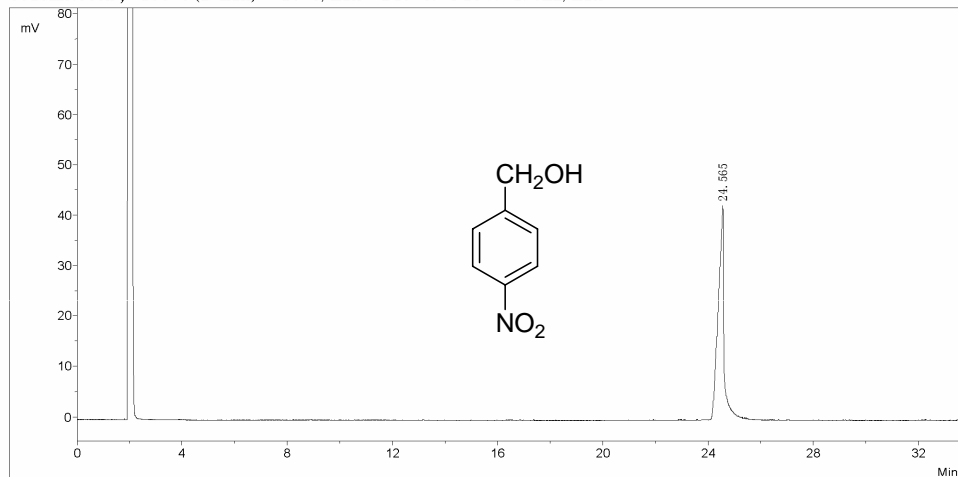

| No.   | PeakNo | ID. Name | R. Time | PeakHeight | PeakArea | Conc (%) |
|-------|--------|----------|---------|------------|----------|----------|
| 1     | 1      |          | 24.565  | 42228.7    | 653143.7 | 100.0000 |
| Total |        |          |         | 42228.7    | 653143.7 | 100.0000 |

**Figure 19.**  
**GC diagram of 4-nitrobenzyl alcohol**

## Supporting Information

C:\HS2000G\Oxidation\20070107-4.che

2007-01-29

### GC REPORT

Sample Name: File Name: C:\HS2000G\Oxidation\20070107-4.che  
Method: area normalization Injection Date: 2007.01.07 18:24  
Column: FFAP, 100 C(2 min)--10 C/min--240 C. Flow: 1.0mL/min

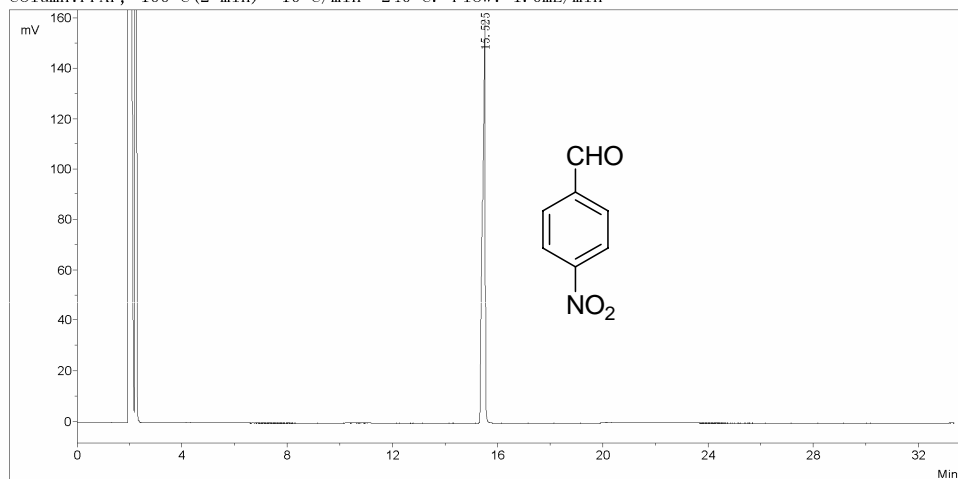

| No.   | PeakNo | ID. Name | R. Time | PeakHeight | PeakArea  | Conc (%) |
|-------|--------|----------|---------|------------|-----------|----------|
| 1     | 1      |          | 15.525  | 159982.6   | 1144521.7 | 100.0000 |
| Total |        |          |         | 159982.6   | 1144521.7 | 100.0000 |

**Figure 20.**  
**GC diagram of 4-nitro benzaldehyde from oxidation of 4-nitro benzyl alcohol.**

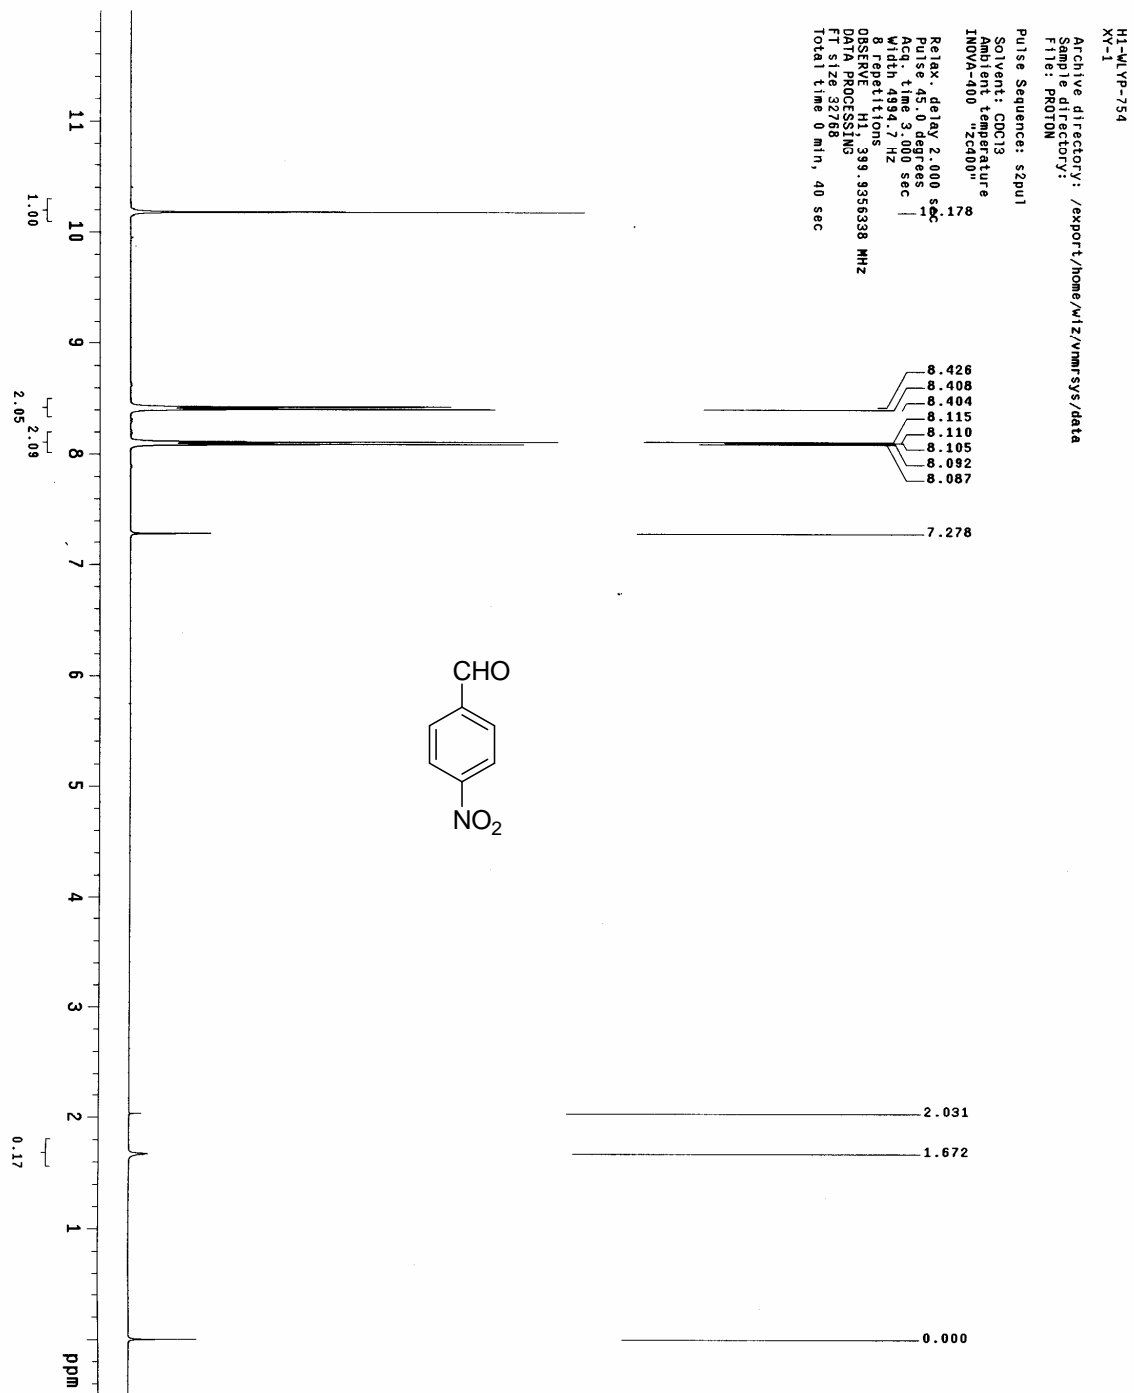

Figure 21.  
<sup>1</sup>H NMR spectrum of 4-nitro benzaldehyde

## Supporting Information

C:\HS2000G\Oxidation\20070108-6.che

2007-01-29

### GC REPORT

Sample Name: C<sub>6</sub>H<sub>5</sub>CH(CH<sub>3</sub>)OH

File Name: C:\HS2000G\Oxidation\20070108-6.che

Method: area normalization

Injection Date: 2007.01.08 20:06

Column: FFAP, 100 C(2 min)--10 C/min--240 C. Flow: 1.0mL/min

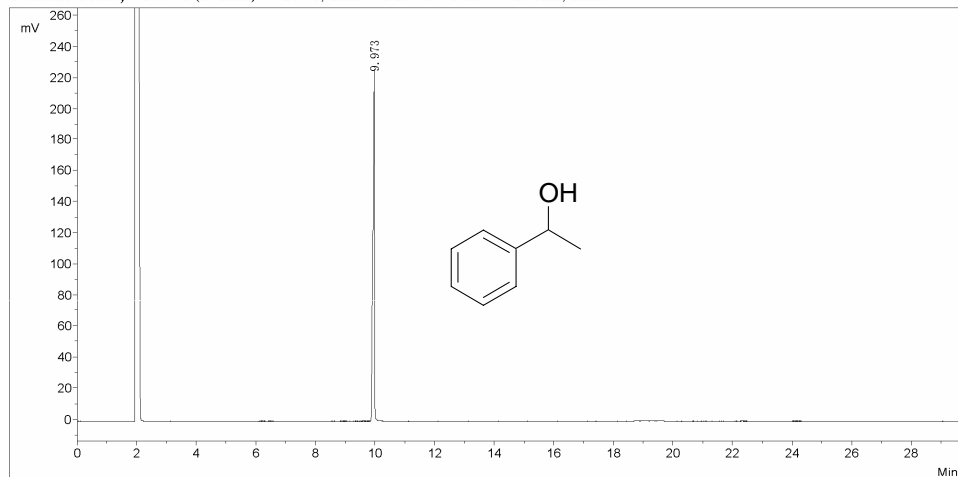

| No.   | PeakNo | ID. Name | R. Time | PeakHeight | PeakArea | Conc (%) |
|-------|--------|----------|---------|------------|----------|----------|
| 1     | 1      |          | 9.973   | 221748.2   | 849120.2 | 100.0000 |
| Total |        |          |         | 221748.2   | 849120.2 | 100.0000 |

**Figure 22.**  
**GC diagram of  $\alpha$ -methyl-benzyl alcohol**

## Supporting Information

C:\HS2000G\Oxidation\20070110-1.che

2007-01-29

### GC REPORT

Sample Name: File Name: C:\HS2000G\Oxidation\20070110-1.che  
Method: area normalization Injection Date: 2007.01.10 09:01  
Column: FFAP, 100 C(2 min)--10 C/min--240 C. Flow: 1.0mL/min

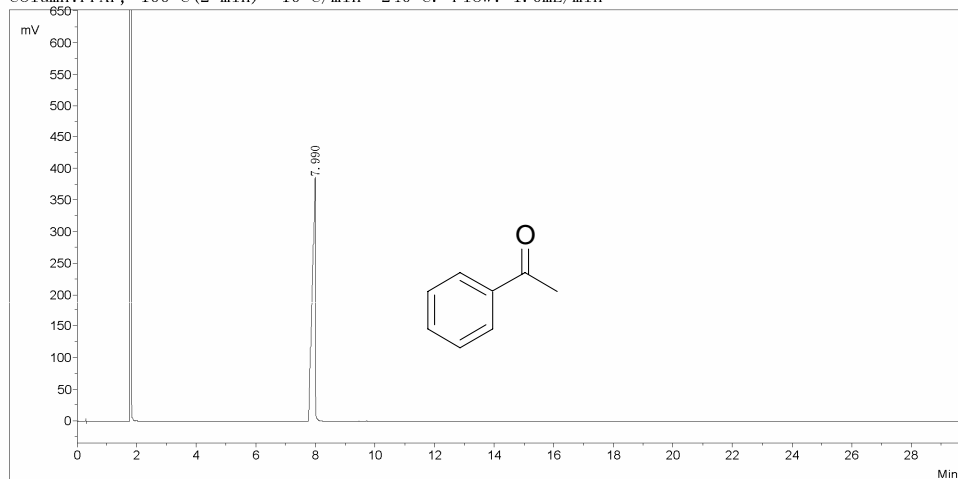

| No.   | PeakNo | ID. Name | R. Time | PeakHeight | PeakArea  | Conc (%) |
|-------|--------|----------|---------|------------|-----------|----------|
| 1     | 1      |          | 7.990   | 378598.3   | 2812109.3 | 100.0000 |
| Total |        |          |         | 378598.3   | 2812109.3 | 100.0000 |

**Figure 23.**  
**GC diagram of acetophenone from oxidation of  $\alpha$ -methyl benzyl alcohol.**

## Supporting Information

C:\HS2000G\Oxidation\20070118-4.che

2007-01-29

### GC REPORT

Sample Name: 4-CH<sub>3</sub>C<sub>6</sub>H<sub>4</sub>CH(CH<sub>3</sub>)OH

File Name: C:\HS2000G\Oxidation\20070118-4.che

Method: area normalization

Injection Date: 2007.01.18 14:20

Column: FFAP, 100 C (2 min) -- 10 C/min -- 240 C. Flow: 1.0 mL/min

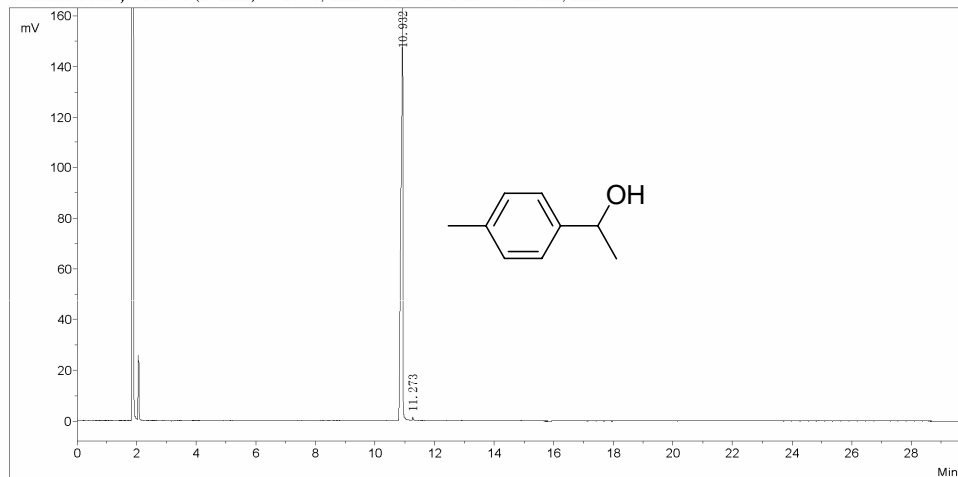

| No.   | PeakNo | ID. Name | R. Time | PeakHeight | PeakArea | Conc (%) |
|-------|--------|----------|---------|------------|----------|----------|
| 1     | 1      |          | 10.932  | 167371.0   | 728294.5 | 99.6720  |
| 2     | 2      |          | 11.273  | 1203.0     | 2396.8   | 0.3280   |
| Total |        |          |         | 168574.0   | 730691.4 | 100.0000 |

**Figure 24.**  
**GC diagram of 1-(4-methylphenyl)-1-ethanol**

## Supporting Information

C:\HS2000G\Oxidation\20070118-6.che

2007-01-29

### GC REPORT

Sample Name: File Name: C:\HS2000G\Oxidation\20070118-6.che  
Method: area normalization Injection Date: 2007.01.18 19:24  
Column: FFAP, 100 C(2 min)--10 C/min--240 C. Flow: 1.0mL/min

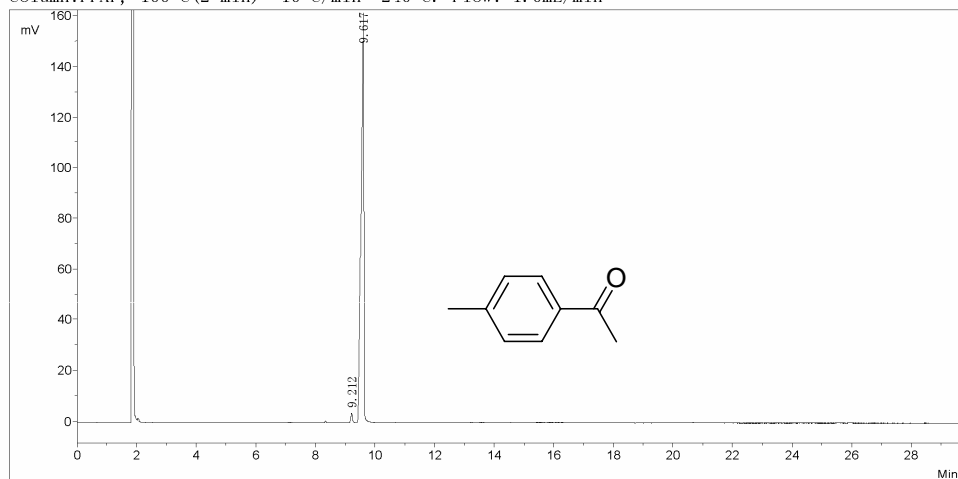

| No.   | PeakNo | ID. Name | R. Time | PeakHeight | PeakArea | Conc (%) |
|-------|--------|----------|---------|------------|----------|----------|
| 1     | 1      |          | 9.212   | 3349.7     | 11963.7  | 1.2062   |
| 2     | 2      |          | 9.617   | 161383.1   | 979878.9 | 98.7938  |
| Total |        |          |         | 164732.9   | 991842.5 | 100.0000 |

**Figure 25.**  
**GC diagram of 4-methyl acetophenone from oxidation of 1-(4-methylphenyl)-1-ethanol.**

## Supporting Information

C:\HS2000G\Oxidation\20061231-8.che

2007-01-29

### GC REPORT

Sample Name:4-ClC<sub>6</sub>H<sub>4</sub>CH(CH<sub>3</sub>)OH

File Name:C:\HS2000G\Oxidation\20061231-8.che

Method:area normalization

Injection Date:2006.12.31 19:46

Column:FFAP, 100 C(2 min)--10 C/min--240 C. Flow: 1.0mL/min

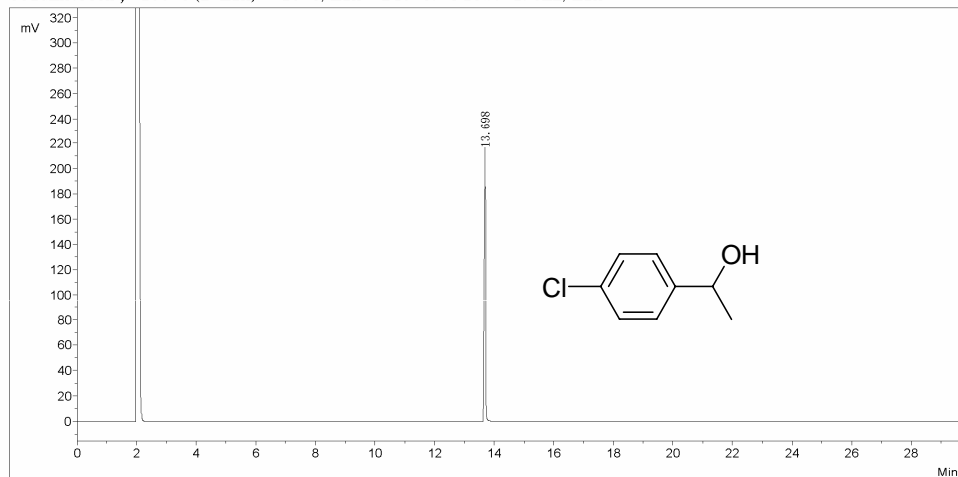

| No.   | PeakNo | ID. Name | R. Time | PeakHeight | PeakArea | Conc (%) |
|-------|--------|----------|---------|------------|----------|----------|
| 1     | 1      |          | 13.698  | 212065.3   | 665964.3 | 100.0000 |
| Total |        |          |         | 212065.3   | 665964.3 | 100.0000 |

**Figure 26.**  
**GC diagram of 1-(4-chlorophenyl)-1-ethanol**

## Supporting Information

C:\HS2000G\Oxidation\20070104-1.che

2007-01-29

### GC REPORT

Sample Name: File Name: C:\HS2000G\Oxidation\20070104-1.che  
Method: area normalization Injection Date: 2007.01.04 08:57  
Column: FFAP, 100 C(2 min)--10 C/min--240 C. Flow: 1.0mL/min

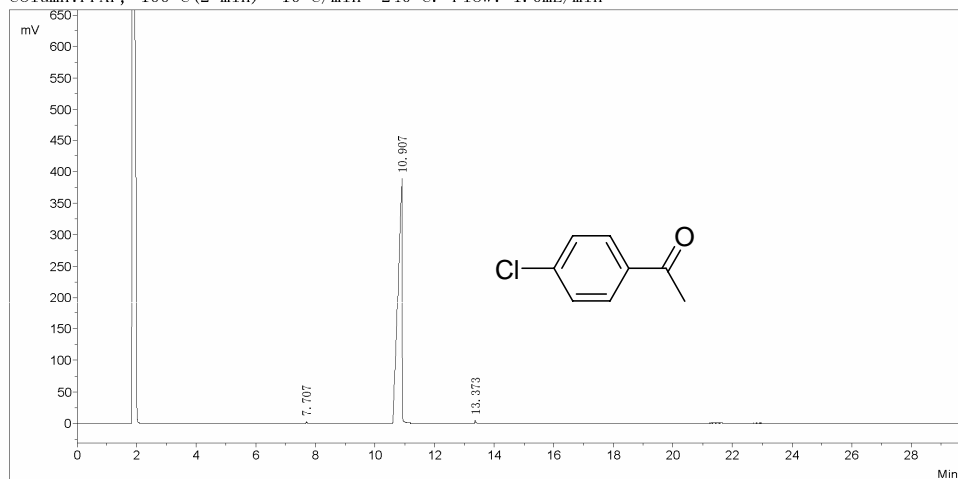

| No.   | PeakNo | ID. Name | R. Time | PeakHeight | PeakArea  | Conc (%) |
|-------|--------|----------|---------|------------|-----------|----------|
| 1     | 1      |          | 7.707   | 2139.0     | 3491.0    | 0.0935   |
| 2     | 2      |          | 10.907  | 389143.7   | 3715883.6 | 99.5524  |
| 3     | 3      |          | 13.373  | 4987.3     | 13216.4   | 0.3541   |
| Total |        |          |         | 396270.0   | 3732591.0 | 100.0000 |

**Figure 27.**  
**GC diagram of 4-chloro acetophenone from oxidation of 1-(4-chlorophenyl)-1-ethanol.**

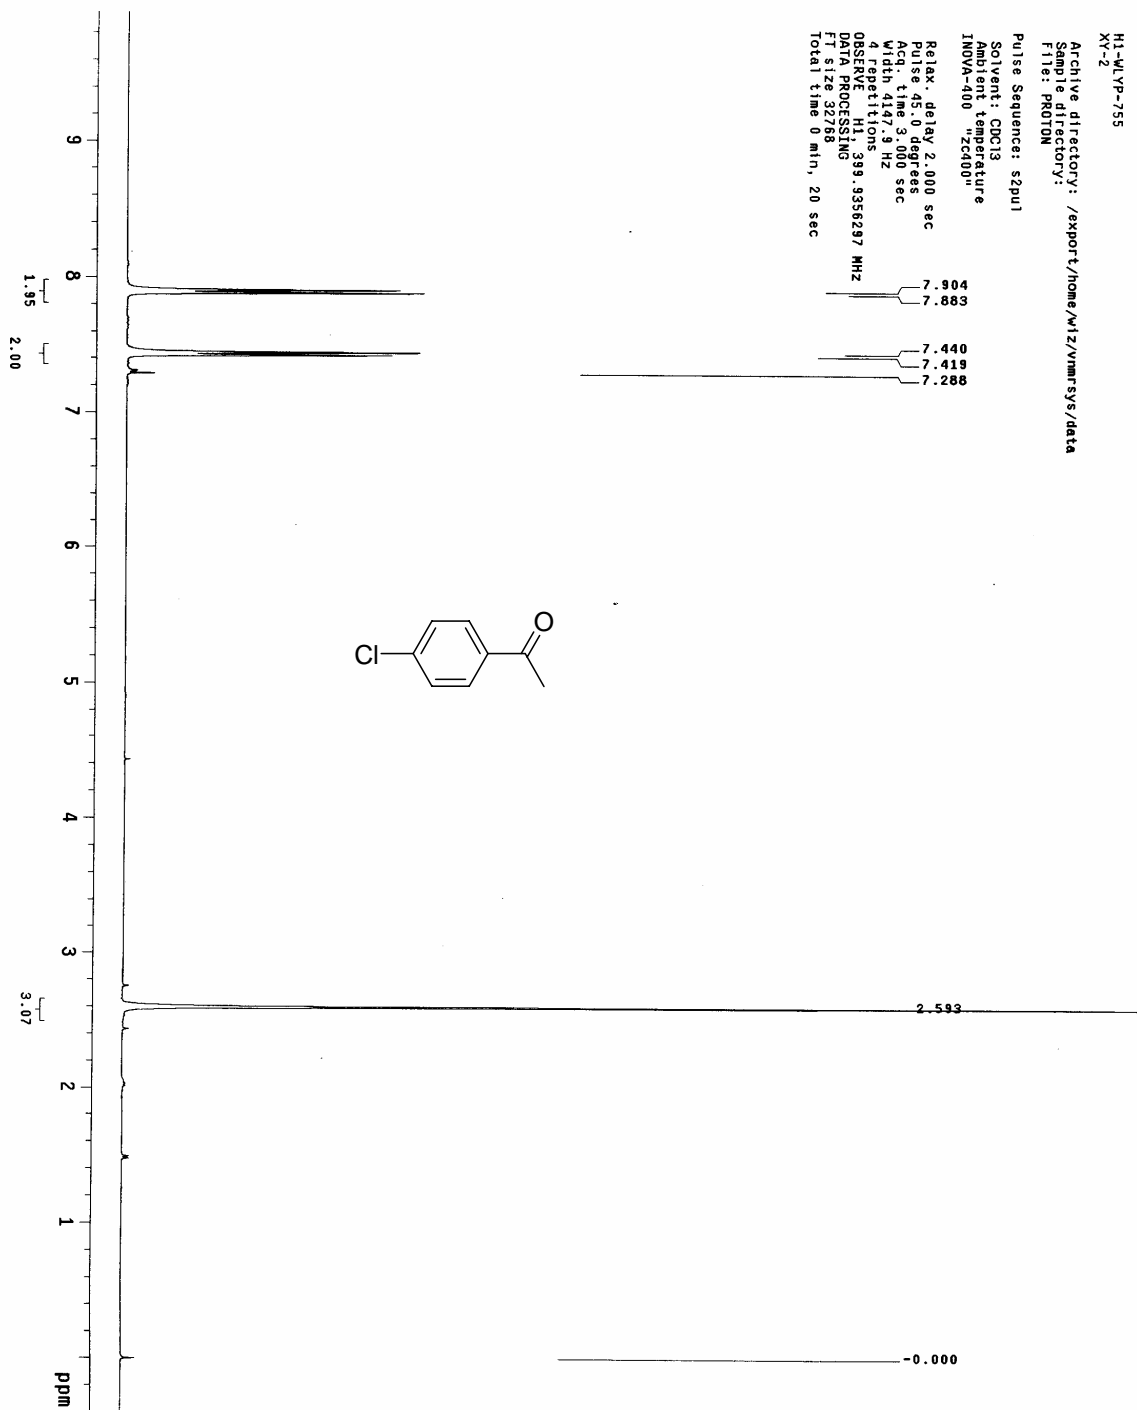

Figure 28.  
<sup>1</sup>H NMR spectrum of 4-chloroacetophenone (isolated)

## Supporting Information

C:\HS2000G\Oxidation\20070117-3. che

2007-01-29

### GC REPORT

Sample Name:2-Octanol

File Name:C:\HS2000G\Oxidation\20070117-3. che

Method:area normalization

Injection Date:2007.01.17 19:04

Column:FFAP, 80 C(5 min)--10 C/min--240 C. Flow: 1.0mL/min

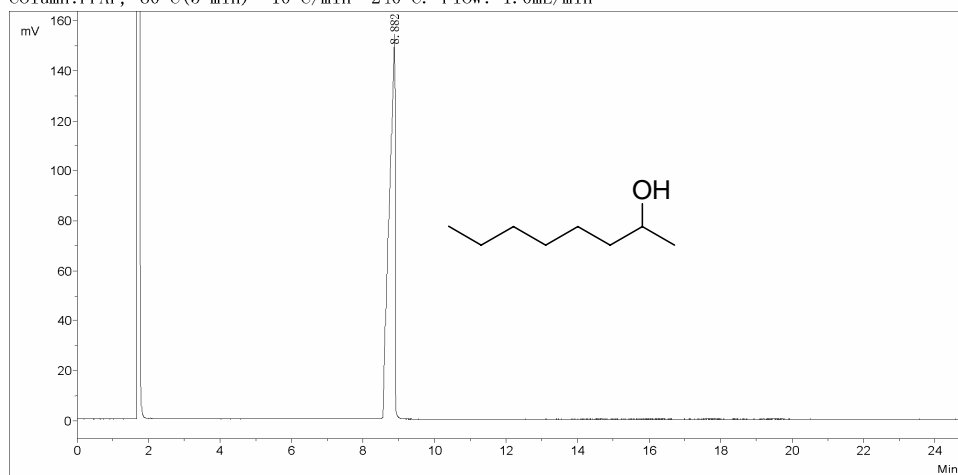

| No.   | PeakNo | ID. Name | R. Time | PeakHeight | PeakArea  | Conc (%) |
|-------|--------|----------|---------|------------|-----------|----------|
| 1     | 1      |          | 8.882   | 151633.1   | 1694121.9 | 100.0000 |
| Total |        |          |         | 151633.1   | 1694121.9 | 100.0000 |

**Figure 29.**  
**GC diagram of 2-octanol.**

## Supporting Information

C:\HS2000G\Oxidation\20070116-2.che

2007-01-29

### GC REPORT

Sample Name: File Name: C:\HS2000G\Oxidation\20070116-2.che  
Method: area normalization Injection Date: 2007.01.16 18:49  
Column: FFAP, 80 C (5 min)—10 C/min—240 C. Flow: 1.0 mL/min

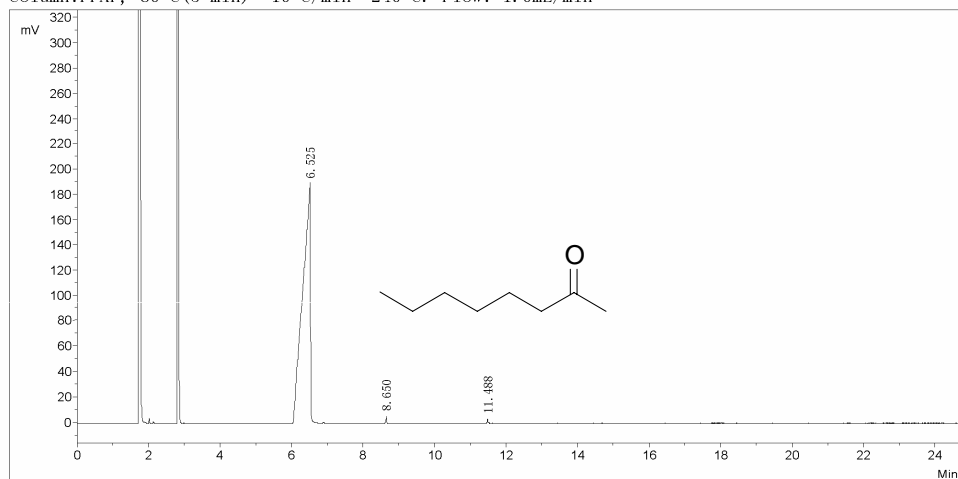

| No.   | PeakNo | ID. Name | R. Time | PeakHeight | PeakArea  | Conc (%) |
|-------|--------|----------|---------|------------|-----------|----------|
| 1     | 1      |          | 6.525   | 188927.8   | 2805217.3 | 99.5546  |
| 2     | 2      |          | 8.650   | 5243.2     | 8297.1    | 0.2945   |
| 3     | 3      |          | 11.488  | 3063.5     | 4252.4    | 0.1509   |
| Total |        |          |         | 197234.6   | 2817766.7 | 100.0000 |

**Figure 30.**  
**GC diagram of 2-octanone from oxidation of 2-octanol.**

## Supporting Information

C:\HS2000G\Oxidation\20070117-2. che

2007-01-29

### GC REPORT

Sample Name:1-Octanol

File Name:C:\HS2000G\Oxidation\20070117-2. che

Method:area normalization

Injection Date:2007.01.17 10:45

Column:FFAP, 80 C(5 min)--10 C/min--240 C. Flow: 1.0mL/min

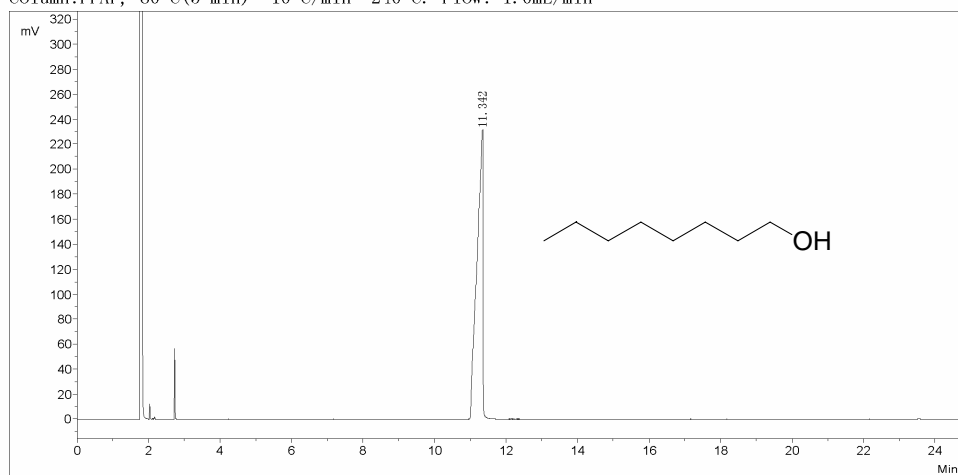

| No.   | PeakNo | ID. Name | R. Time | PeakHeight | PeakArea  | Conc (%) |
|-------|--------|----------|---------|------------|-----------|----------|
| 1     | 1      |          | 11.342  | 229509.1   | 2601290.9 | 100.0000 |
| Total |        |          |         | 229509.1   | 2601290.9 | 100.0000 |

**Figure 31**  
**GC diagram of 1-octanol.**

## Supporting Information

C:\HS2000G\Oxidation\20070124-2.che

2007-01-31

### GC REPORT

Sample Name: File Name: C:\HS2000G\Oxidation\20070124-2.che  
Method: area normalization Injection Date: 2007.01.24 20:39  
Column: FFAP, 80 C(5 min)—10 C/min—240 C. Flow: 1.0mL/min

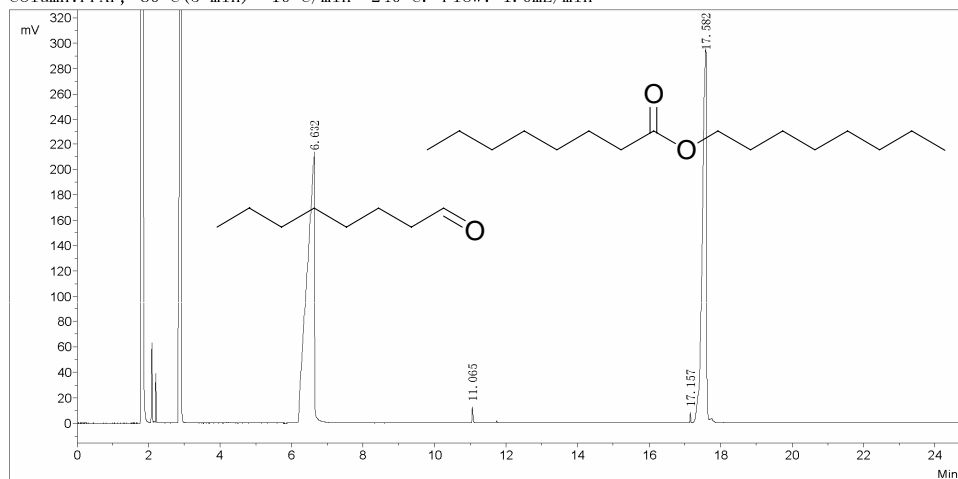

| No.   | PeakNo | ID. Name | R. Time | PeakHeight | PeakArea  | Conc (%) |
|-------|--------|----------|---------|------------|-----------|----------|
| 1     | 1      |          | 6.632   | 210770.9   | 3058737.1 | 54.3029  |
| 2     | 2      |          | 11.065  | 12716.5    | 26946.9   | 0.4784   |
| 3     | 3      |          | 17.157  | 8231.4     | 13413.5   | 0.2381   |
| 4     | 4      |          | 17.582  | 295592.7   | 2533636.6 | 44.9806  |
| Total |        |          |         | 527311.6   | 5632734.2 | 100.0000 |

**Figure 32**  
**GC diagram of oxidation of 1-octanol.**

## Supporting Information

C:\HS2000G\Oxidation\20070125-2.che

2007-01-29

### GC REPORT

Sample Name:

File Name:C:\HS2000G\Oxidation\20070125-2.che

Method:area normalization

Injection Date:2007.01.25 20:54

Column:FFAP, 80 C(5 min)--10 C/min--240 C. Flow: 1.0mL/min

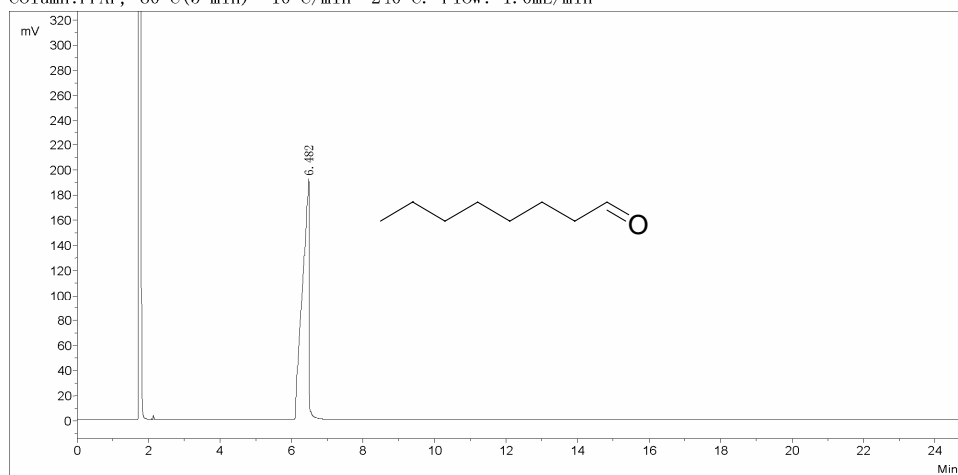

| No.   | PeakNo | ID. Name | R. Time | PeakHeight | PeakArea  | Conc (%) |
|-------|--------|----------|---------|------------|-----------|----------|
| 1     | 1      |          | 6.482   | 190312.7   | 2459320.5 | 100.0000 |
| Total |        |          |         | 190312.7   | 2459320.5 | 100.0000 |

**Figure 33**  
**GC diagram of 1-octanal (isolated via distillation).**

## HS 色谱数据工作站分析报告

样品名称:

文件名:-20070115-5

进样时间:2007年01月15日

半峰宽:5 斜率:50

分析方法:面积 归一法

色谱仪:

检测器:

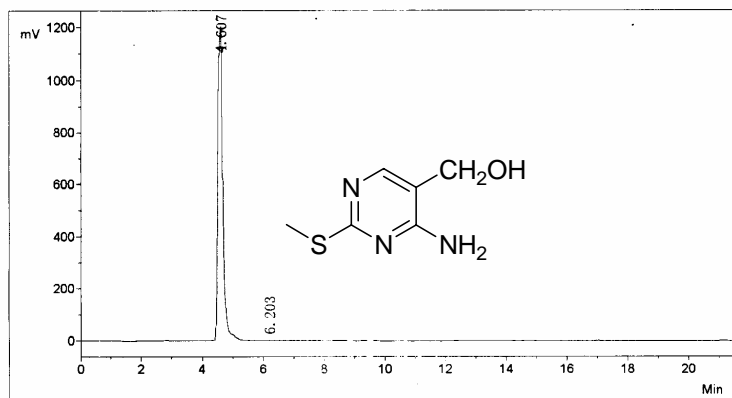

| 序号 | 峰号 | 组份名 | 保留时间  | 峰高        | 峰面积        | 含量       |
|----|----|-----|-------|-----------|------------|----------|
| 1  | 1  |     | 4.607 | 1201915.4 | 14008640.4 | 99.9167  |
| 2  | 2  |     | 6.203 | 872.9     | 11685.1    | 0.0833   |
| 合计 |    |     |       | 1202788.3 | 14020325.5 | 100.0000 |

Figure 34.  
HPLC diagram of 4-amino-2-methylthio-pyrimidine-5-methanol.

## HS 色谱数据工作站分析报告

样品名称:

文件名:-20070118-1

进样时间:2007年01月18日

半峰宽:5 斜率:50

分析方法:面积 归一法

色谱仪:

检测器:

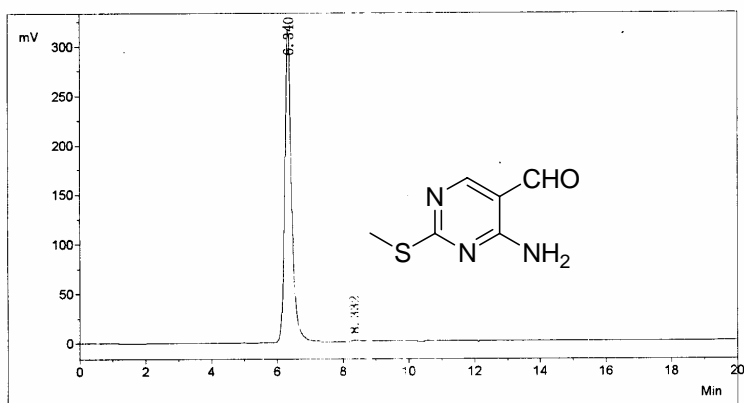

| 序号 | 峰号 | 组份名 | 保留时间  | 峰高      | 峰面积       | 含量       |
|----|----|-----|-------|---------|-----------|----------|
| 1  | 1  |     | 6.340 | 35503.9 | 4507693.2 | 99.6782  |
| 2  | 2  |     | 8.332 | 683.7   | 14553.1   | 0.3218   |
| 合计 |    |     |       | 36187.6 | 4522246.3 | 100.0000 |

**Figure 35.**  
HPLC diagram of 4-amino-2-methylthio-pyrimidine-5-carboxaldehyde (isolated)

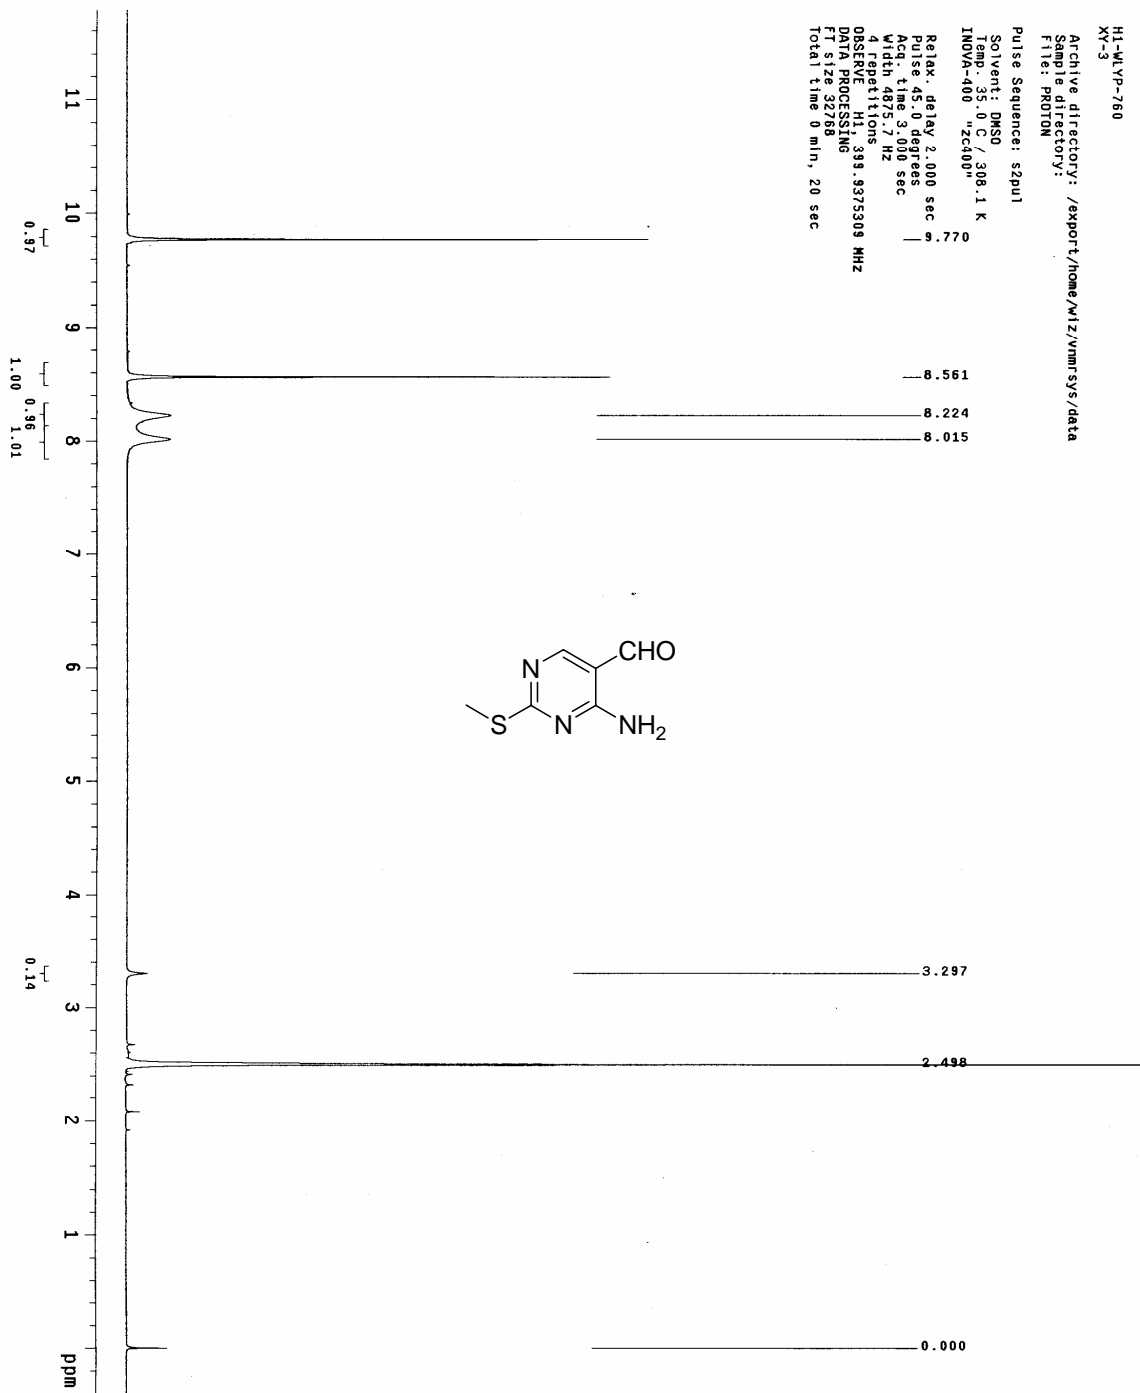

**Figure 36**  
**<sup>1</sup>H NMR spectrum of 4-amino-2-methylthio-pyrimidine-5-carboxaldehyde (isolated).**

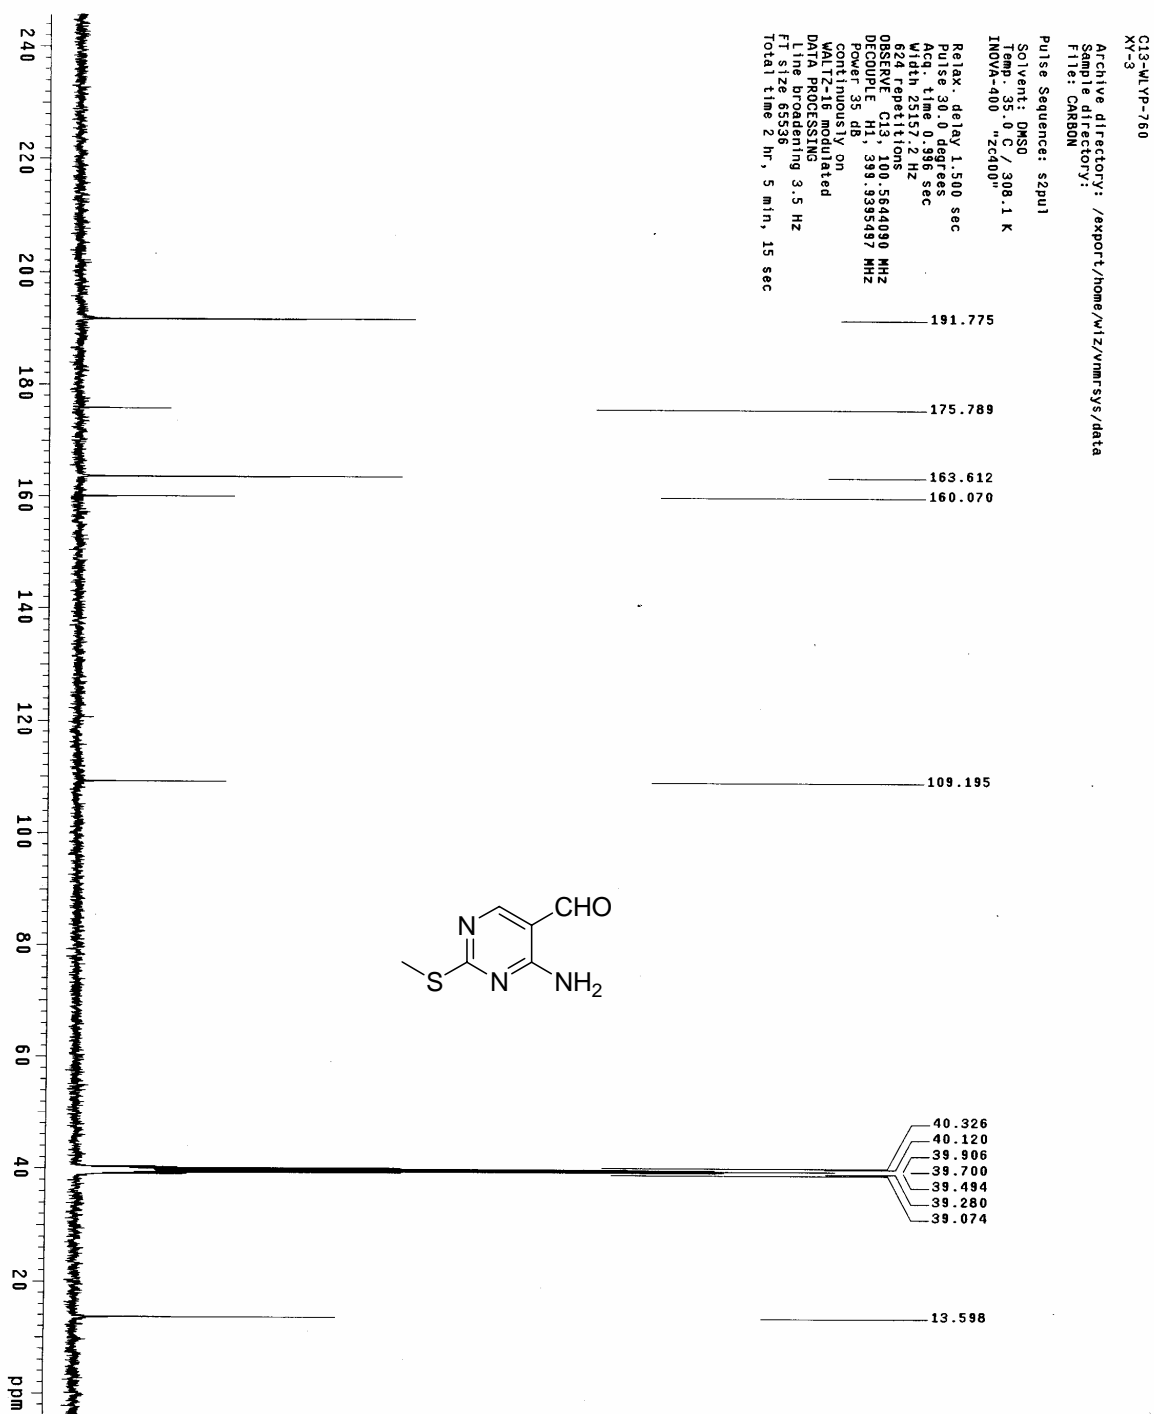

Figure 37.  
<sup>13</sup>C NMR spectrum of 4-amino-2-methylthio-pyrimidine-5-carboxaldehyde (isolated)
